# Supplementary material
Source: PubMed Central journal article supplement (PMC5955210)
Supplement: NIHMS61402-supplement-Supplementary_Table_8.pdf [file NIHMS61402-supplement-Supplementary_Table_8.pdf]

**SI Table 8. Evidence of developmental role of 21 candidate genes from animal models**

| Gene           | Inheritance <sup>a</sup> | Concordance <sup>b</sup> | Zebrafish Replication <sup>c</sup> | Human <sup>d</sup> | Mouse | Zebrafish | Frog | Fly | Combined Evidence <sup>e</sup> | Summary                                                                                                                                                                                                                         |
|----------------|--------------------------|--------------------------|------------------------------------|--------------------|-------|-----------|------|-----|--------------------------------|---------------------------------------------------------------------------------------------------------------------------------------------------------------------------------------------------------------------------------|
| <i>BTBD9</i>   | mono/bi                  | strong                   | C                                  |                    | C     | .         | .    | C   | C                              | Mouse mutant shows neurochemical, learning and memory defects <sup>1,2</sup> . Drosophila mutant shows abnormal behaviour <sup>3</sup>                                                                                          |
| <i>CHD3</i>    | mono                     | strong                   | C                                  |                    | .     | .         | .    | C   | C                              | Drosophila mutant is larval lethal <sup>4,5</sup>                                                                                                                                                                               |
| <i>CNOT1</i>   | mono                     | weak                     | .                                  |                    | .     | C         | .    | C   | C                              | Zebrafish mutant shows head and body size defect <sup>6</sup> (www.zfin.org). Drosophila knockdown shows neurodevelopmental defects and lethality <sup>7,8</sup> .                                                              |
| <i>DDX3X</i>   | mono                     | strong                   | C                                  | GWS                | C     | .         | C    | C   | C                              | Mouse knockdown shows early lethality <sup>9</sup> . Xenopus knockdown shows head, trunk and pigment defects, rescued by mRNA injection <sup>10</sup> . Drosophila mutant has mitotic defects, some lethality <sup>11</sup> .   |
| <i>DPEP2</i>   | bi                       | moderate                 | C                                  |                    | .     | .         | .    | C   | C                              | Drosophila knockdown has morphological defects <sup>7</sup>                                                                                                                                                                     |
| <i>DTWD2</i>   | mono                     | weak                     | .                                  |                    | .     | .         | .    | .   | .                              |                                                                                                                                                                                                                                 |
| <i>ETF1</i>    | mono                     | strong                   | .                                  |                    | .     | .         | .    | C   | C                              | Drosophila mutant is embryonic lethal <sup>12</sup>                                                                                                                                                                             |
| <i>FRYL</i>    | mono                     | strong                   | C                                  |                    | C     | .         | .    | C   | C                              | Mouse mutant shows homozygous embryonic lethality, and heart defect in heterozygous mutants (www.sanger.ac.uk/mouseportal, <sup>13</sup> ). Drosophila mutant shows developmental defects and larval lethality <sup>14,15</sup> |
| <i>ILVBL</i>   | mono                     | weak                     | .                                  |                    | .     | .         | .    | .   | .                              |                                                                                                                                                                                                                                 |
| <i>NONO</i>    | mono                     | weak                     | .                                  |                    | C     | .         | C    | C   | C                              | Mouse mutant shows neurological defects <sup>16,17</sup> . Xenopus knockdown shows defective neural patterning <sup>18</sup> . Drosophila mutant shows defective behaviour <sup>19</sup> .                                      |
| <i>PKN2</i>    | mono                     | strong                   | C                                  |                    | .     | .         | .    | C   | C                              | Drosophila mutant is recessive lethal <sup>15,20</sup>                                                                                                                                                                          |
| <i>POGZ</i>    | mono                     | weak                     | .                                  | GWS                | .     | .         | .    | C   | C                              | Drosophila mutant is lethal <sup>4</sup>                                                                                                                                                                                        |
| <i>PSD2</i>    | mono                     | moderate                 | C                                  |                    | .     | .         | .    | C   | C                              | Drosophila mutant shows neural patterning defect <sup>21</sup>                                                                                                                                                                  |
| <i>PSMD3</i>   | mono                     | strong                   | .                                  |                    | .     | .         | .    | C   | C                              | Drosophila mutant is larval lethal <sup>22</sup>                                                                                                                                                                                |
| <i>SAP130</i>  | mono                     | moderate                 | .                                  |                    | .     | .         | .    | C   | C                              | Drosophila mutant is recessive lethal <sup>7,15</sup>                                                                                                                                                                           |
| <i>SCGN</i>    | bi                       | strong                   | C                                  |                    | .     | .         | .    | C/D | C/D                            | Drosophila knockdown shows partial lethality <sup>7</sup> , insertional mutant is viable <sup>23</sup> .                                                                                                                        |
| <i>SETD5</i>   | mono                     | strong                   | D                                  | GWS                | C     | .         | .    | D   | C/D                            | Mouse mutant is homozygous lethal <sup>24</sup> . Drosophila mutant is infertile <sup>25</sup> . Gene is genome-wide significant in human patients <sup>26</sup> .                                                              |
| <i>SMARCD1</i> | mono                     | weak                     | D                                  |                    | .     | .         | .    | C   | C                              | Drosophila mutant is embryonic lethal <sup>27</sup>                                                                                                                                                                             |
| <i>THNSL2</i>  | bi                       | strong                   | C                                  |                    | .     | .         | .    | .   | .                              |                                                                                                                                                                                                                                 |
| <i>WWC1</i>    | mono                     | none                     | .                                  |                    | C     | .         | .    | C   | C                              | Mouse mutant shows defects in learning, memory <sup>28,29</sup> . Drosophila mutant is recessive lethal <sup>30</sup>                                                                                                           |
| <i>ZRANB1</i>  | mono                     | strong                   | .                                  |                    | .     | C         | .    | C   | C                              | Zebrafish morphant strong embryonic phenotypes <sup>31</sup> . Drosophila knockdown shows lethality during eclosion <sup>32</sup> .                                                                                             |

## Evidence of developmental role of 21 candidate genes from animal models

Concordant ('C') and Contradictory ('D') data from different animal models as to the developmental role of 21 genes showing a developmental phenotype in zebrafish knockdown experiments.

<sup>a</sup> Damaging variant observed monoallelic ('mono') or biallelic ('bi) in patients.

<sup>b</sup> Concordance between phenotype in fish knockdown and patient

<sup>c</sup> Results of different morpholinos targeting the same gene

<sup>d</sup> Genome-wide significance (GWS) of mutation enrichment in patients

<sup>e</sup> Summary of evidence across all organisms

## References

- 1 DeAndrade, M. P. *et al.* Motor restlessness, sleep disturbances, thermal sensory alterations and elevated serum iron levels in Btbd9 mutant mice. *Human molecular genetics* **21**, 3984-3992, doi:10.1093/hmg/dds221 (2012).
- 2 DeAndrade, M. P. *et al.* Enhanced hippocampal long-term potentiation and fear memory in Btbd9 mutant mice. *PLoS One* **7**, e35518, doi:10.1371/journal.pone.0035518 (2012).
- 3 Freeman, A. *et al.* Sleep fragmentation and motor restlessness in a Drosophila model of Restless Legs Syndrome. *Current biology : CB* **22**, 1142-1148, doi:10.1016/j.cub.2012.04.027 (2012).
- 4 Buszczak, M. *et al.* The Carnegie protein trap library: a versatile tool for Drosophila developmental studies. *Genetics* **175**, 1505-1531, doi:10.1534/genetics.106.065961 (2007).
- 5 Deak, P. *et al.* P-element insertion alleles of essential genes on the third chromosome of Drosophila melanogaster: correlation of physical and cytogenetic maps in chromosomal region 86E-87F. *Genetics* **147**, 1697-1722 (1997).
- 6 Kishi, S. *et al.* The identification of zebrafish mutants showing alterations in senescence-associated biomarkers. *PLoS Genet* **4**, e1000152, doi:10.1371/journal.pgen.1000152 (2008).
- 7 Mummery-Widmer, J. L. *et al.* Genome-wide analysis of Notch signalling in Drosophila by transgenic RNAi. *Nature* **458**, 987-992, doi:10.1038/nature07936 (2009).
- 8 Neumuller, R. A. *et al.* Genome-wide analysis of self-renewal in Drosophila neural stem cells by transgenic RNAi. *Cell stem cell* **8**, 580-593, doi:10.1016/j.stem.2011.02.022 (2011).
- 9 Li, Q. *et al.* DDX3X regulates cell survival and cell cycle during mouse early embryonic development. *Journal of biomedical research* **28**, 282-291, doi:10.7555/jbr.27.20130047 (2014).
- 10 Cruciat, C. M. *et al.* RNA helicase DDX3 is a regulatory subunit of casein kinase 1 in Wnt-beta-catenin signaling. *Science* **339**, 1436-1441, doi:10.1126/science.1231499 (2013).
- 11 Pek, J. W. & Kai, T. DEAD-box RNA helicase Belle/DDX3 and the RNA interference pathway promote mitotic chromosome segregation. *Proceedings of the National Academy of Sciences of the United States of America* **108**, 12007-12012, doi:10.1073/pnas.1106245108 (2011).
- 12 Chao, A. T., Dierick, H. A., Addy, T. M. & Bejsovec, A. Mutations in eukaryotic release factors 1 and 3 act as general nonsense suppressors in Drosophila. *Genetics* **165**, 601-612 (2003).
- 13 Brown, S. D. & Moore, M. W. The International Mouse Phenotyping Consortium: past and future perspectives on mouse phenotyping. *Mammalian genome : official journal of the International Mammalian Genome Society* **23**, 632-640, doi:10.1007/s00335-012-9427-x (2012).

- 14 Cong, J. *et al.* The furry gene of Drosophila is important for maintaining the integrity of cellular extensions during morphogenesis. *Development (Cambridge, England)* **128**, 2793-2802 (2001).
- 15 Spradling, A. C. *et al.* The Berkeley Drosophila Genome Project gene disruption project: Single P-element insertions mutating 25% of vital Drosophila genes. *Genetics* **153**, 135-177 (1999).
- 16 Kowalska, E. *et al.* NONO couples the circadian clock to the cell cycle. *Proceedings of the National Academy of Sciences of the United States of America* **110**, 1592-1599, doi:10.1073/pnas.1213317110 (2013).
- 17 Kowalska, E. *et al.* Distinct roles of DBHS family members in the circadian transcriptional feedback loop. *Molecular and cellular biology* **32**, 4585-4594, doi:10.1128/mcb.00334-12 (2012).
- 18 Neant, I., Deisig, N., Scerbo, P., Leclerc, C. & Moreau, M. The RNA-binding protein Xp54nrb isolated from a Ca(2+)-dependent screen is expressed in neural structures during Xenopus laevis development. *The International journal of developmental biology* **55**, 923-931, doi:10.1387/ijdb.103253in (2011).
- 19 Sandrelli, F. *et al.* Molecular Dissection of the 5' Region of no-on-transientA of Drosophila melanogaster Reveals cis-Regulation by Adjacent dGpi1 Sequences. *Genetics* **157**, 765-775 (2001).
- 20 Lu, Y. & Settleman, J. The Drosophila Pkn protein kinase is a Rho/Rac effector target required for dorsal closure during embryogenesis. *Genes & development* **13**, 1168-1180 (1999).
- 21 Johnson, R. I., Sedgwick, A., D'Souza-Schorey, C. & Cagan, R. L. Role for a Cindr-Arf6 axis in patterning emerging epithelia. *Molecular biology of the cell* **22**, 4513-4526, doi:10.1091/mbc.E11-04-0305 (2011).
- 22 Pentz, E. S., Black, B. C. & Wright, T. R. A diphenol oxidase gene is part of a cluster of genes involved in catecholamine metabolism and sclerotization in drosophila. I. Identification of the biochemical defect in Dox-A2 [(2)37Bf] mutants. *Genetics* **112**, 823-841 (1986).
- 23 St Pierre, S. E., Ponting, L., Stefancsik, R. & McQuilton, P. FlyBase 102--advanced approaches to interrogating FlyBase. *Nucleic Acids Res* **42**, D780-788, doi:10.1093/nar/gkt1092 (2014).
- 24 Skarnes, W. C. *et al.* A conditional knockout resource for the genome-wide study of mouse gene function. *Nature* **474**, 337-342, doi:10.1038/nature10163 (2011).
- 25 Rincon-Arano, H., Halow, J., Delrow, J. J., Parkhurst, S. M. & Groudine, M. UpSET recruits HDAC complexes and restricts chromatin accessibility and acetylation at promoter regions. *Cell* **151**, 1214-1228, doi:10.1016/j.cell.2012.11.009 (2012).
- 26 Grozeva, D. *et al.* De novo loss-of-function mutations in SETD5, encoding a methyltransferase in a 3p25 microdeletion syndrome critical region, cause intellectual disability. *Am J Hum Genet* **94**, 618-624, doi:10.1016/j.ajhg.2014.03.006 (2014).
- 27 Moller, A., Avila, F. W., Erickson, J. W. & Jackle, H. Drosophila BAP60 is an essential component of the Brahma complex, required for gene activation and repression. *Journal of molecular biology* **352**, 329-337, doi:10.1016/j.jmb.2005.07.009 (2005).
- 28 Makuch, L. *et al.* Regulation of AMPA receptor function by the human memory-associated gene KIBRA. *Neuron* **71**, 1022-1029, doi:10.1016/j.neuron.2011.08.017 (2011).
- 29 Vogt-Eisele, A. *et al.* KIBRA (Kidney/BRAin protein) regulates learning and memory and stabilizes Protein kinase Mzeta. *Journal of neurochemistry* **128**, 686-700, doi:10.1111/jnc.12480 (2014).
- 30 Baumgartner, R., Poernbacher, I., Buser, N., Hafen, E. & Stocker, H. The WW domain protein Kibra acts upstream of Hippo in Drosophila. *Developmental cell* **18**, 309-316, doi:10.1016/j.devcel.2009.12.013 (2010).
- 31 Tse, W. K. *et al.* Genome-wide loss-of-function analysis of deubiquitylating enzymes for zebrafish development. *BMC genomics* **10**, 637, doi:10.1186/1471-2164-10-637 (2009).
- 32 Tsou, W. L. *et al.* Systematic analysis of the physiological importance of deubiquitinating enzymes. *PLoS One* **7**, e43112, doi:10.1371/journal.pone.0043112 (2012).
