# Supplementary material
Source: PubMed Central journal article supplement (PMC5955210)
Supplement: NIHMS61402-supplement-Zebrafish_modelling_data.pdf [file NIHMS61402-supplement-Zebrafish_modelling_data.pdf]

# BTBD9

|                    |                                            |                                                                                                    |                                                                                                                                                                                        |
|--------------------|--------------------------------------------|----------------------------------------------------------------------------------------------------|----------------------------------------------------------------------------------------------------------------------------------------------------------------------------------------|
| Proband phenotypes | Seizures<br>Microcephaly<br>Short philtrum | Microcephaly<br>Prominent nasal bridge<br>Hypertonia<br>Bilateral single transverse palmar creases | Progressive microcephaly<br>Intellectual disability<br>Everted lower lip vermilion<br>Spasticity<br>Delayed speech and language development<br>Abnormality of the eyelid<br>Epicanthus |
| Inheritance        | Autosomal recessive homozygous             | Autosomal recessive homozygous                                                                     | de novo                                                                                                                                                                                |
| Consequence        | frameshift_variant                         | frameshift_variant                                                                                 | missense_variant                                                                                                                                                                       |
| Position           | Chr6:g.38565777 CA>C                       | Chr6:g.38565777 CA>C                                                                               | Chr6:g.38545415 C>T                                                                                                                                                                    |
| Gene ID            | ENSG00000183826                            | ENSG00000183826                                                                                    | ENSG00000183826                                                                                                                                                                        |
| Transcript change  | ENST00000498633.1:c.93delT                 | ENST00000498633.1:c.93delT                                                                         | ENST00000328403.6:c.911G>A                                                                                                                                                             |
| Protein change     | ENSP00000419382.1:p.Ile31MetfsTer22        | ENSP00000419382.1:p.Ile31MetfsTer22                                                                | ENSP00000328328.6:p.Arg304His                                                                                                                                                          |

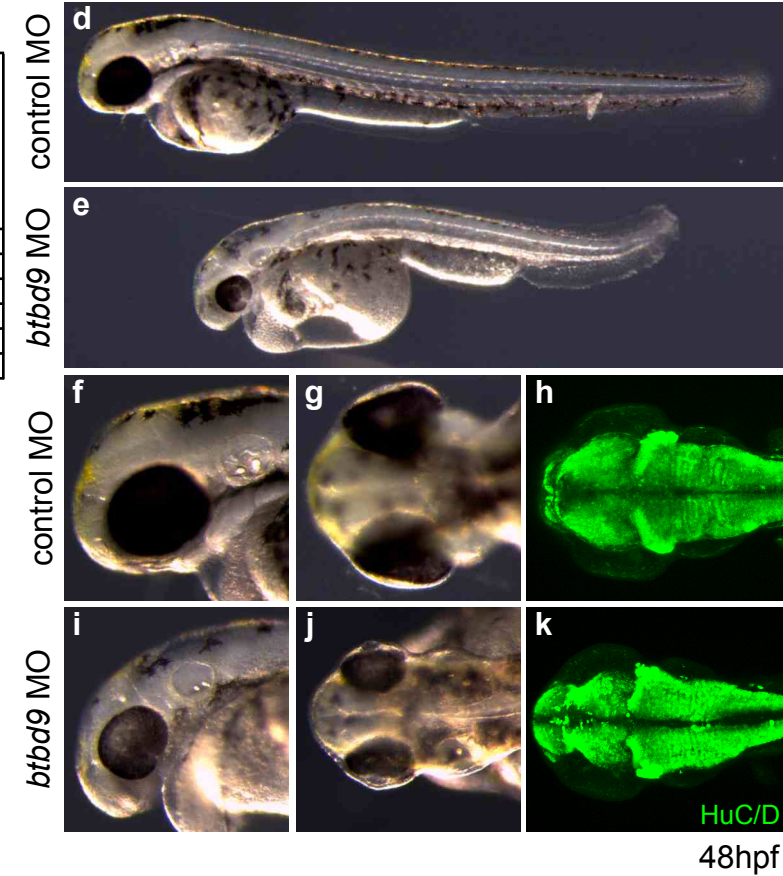

|                        |                                                                                                  |
|------------------------|--------------------------------------------------------------------------------------------------|
| Zebrafish              |                                                                                                  |
| Gene                   | <i>btbd9</i>                                                                                     |
| Gene ID                | ENSDARG00000068983                                                                               |
| Morpholino             | CATTTATTCCGCCACTCACCTTTGA                                                                        |
| Knockdown confirmation | RT-PCR, 2nd Morpholino                                                                           |
| Relevant phenotypes    | Reduced head size (-16.6%, $p < 4 \times 10^{-6}$ )<br>Reduced brain size (-15.3%, $p < 0.002$ ) |
| Phenotypic concordance | Strong                                                                                           |

| MO dose |     | Stage       |                             | Entity      |              | Quality      |                |
|---------|-----|-------------|-----------------------------|-------------|--------------|--------------|----------------|
| high    | 6ng | ZFS:0000033 | Hatching: Long-pec (48 hpf) | ZFA:0001094 | Whole embryo | PATO:0000587 | Decreased size |
|         |     |             |                             | ZFA:0001114 | Head         | PATO:0000587 | Decreased size |
|         |     |             |                             | ZFA:0001115 | Trunk        | PATO:0001468 | Curved dorsal  |
|         |     |             |                             | ZFA:0000092 | Axis         | PATO:0000587 | Decreased size |
|         |     |             |                             | ZFA:0000114 | Heart        | PATO:0000460 | Abnormal       |
|         |     |             |                             | ZFA:0000114 | Heart        | PATO:0001450 | Edematous      |
| low     | 5ng | ZFS:0000033 | Hatching: Long-pec (48 hpf) | ZFA:0000008 | Brain        | PATO:0000587 | Decreased size |
|         |     |             |                             | ZFA:0001114 | Head         | PATO:0000587 | Decreased size |

# CHD3

|                    |                                |                                |                               |
|--------------------|--------------------------------|--------------------------------|-------------------------------|
| Proband phenotypes | Genu valgum                    | Submucous cleft hard palate    | Broad thumb                   |
|                    | Hyperlordosis                  | Intellectual disability        | Global developmental delay    |
|                    | Constipation                   | Hypertelorism                  | Autism                        |
|                    | Global developmental delay     |                                |                               |
|                    | Hypermetropia                  |                                |                               |
|                    | Abnormal facial shape          |                                |                               |
| Cafe-au-lait spot  |                                |                                |                               |
| Inheritance        | de novo                        | de novo                        | de novo                       |
| Consequence        | stop_gained                    | missense_variant               | missense_variant              |
| Position           | Chr17:g.7810193 G>T            | Chr17:g.7806037 G>C            | Chr17:g.7800459 A>G           |
| Gene ID            | ENSG00000170004                | ENSG00000170004                | ENSG00000170004               |
| Transcript change  | ENST00000330494.7:c.4510G>T    | ENST00000330494.7:c.3362G>C    | ENST00000330494.7:c.1766A>G   |
| Protein change     | ENSP00000332628.7:p.Glu1504Ter | ENSP00000332628.7:p.Arg1121Pro | ENSP00000332628.7:p.Glu589Gly |

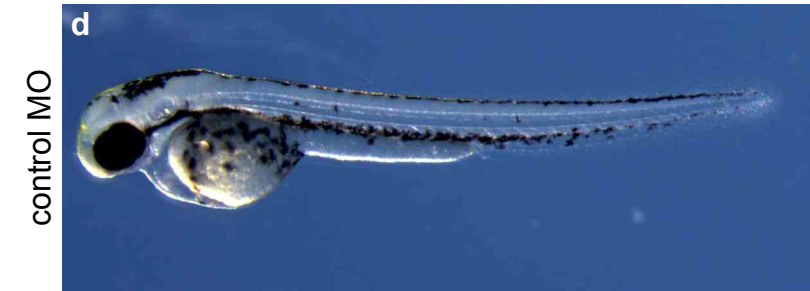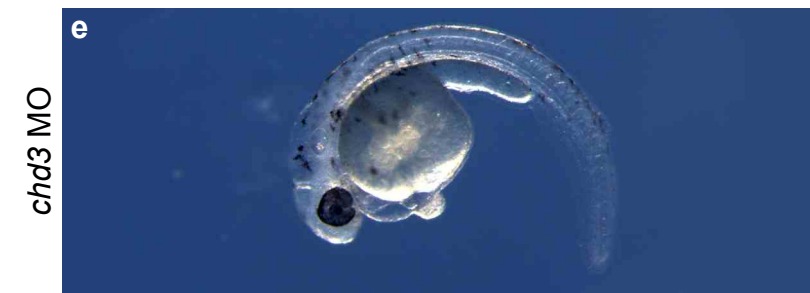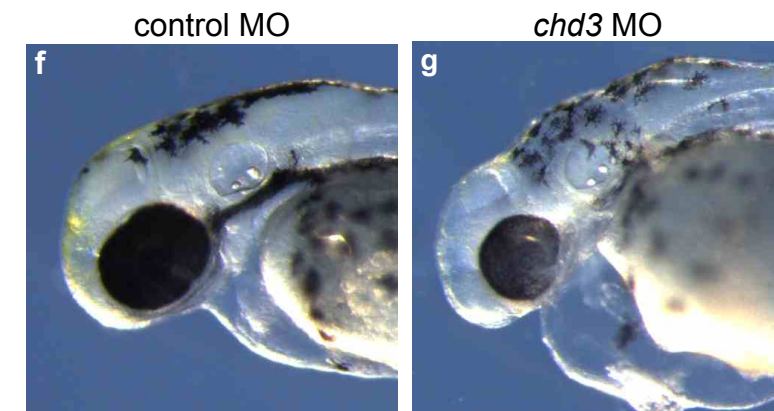

|                        |                             |
|------------------------|-----------------------------|
| Zebrafish              |                             |
| Gene                   | <i>chd3</i>                 |
| Gene ID                | ENSDARG00000021405          |
| Morpholino             | ACTTCTAGTGAAAGTCAGTACCTGA   |
| Knockdown confirmation | RT-PCR, 2nd Morpholino      |
| Relevant phenotypes    | Abnormal CNS and head shape |
| Phenotypic concordance | Strong                      |

| MO dose |     | Stage       |                             | Entity      |                        | Quality      |                     |
|---------|-----|-------------|-----------------------------|-------------|------------------------|--------------|---------------------|
| high    | 6ng | ZFS:0000033 | Hatching: Long-pec (48 hpf) | ZFA:0001114 | Head                   | PATO:0000460 | Abnormal            |
|         |     |             |                             | ZFA:0001094 | Whole embryo           | PATO:0000587 | Decreased size      |
|         |     |             |                             | ZFA:0001094 | Whole embryo           | PATO:0000502 | Delayed             |
|         |     |             |                             | ZFA:0000012 | Central nervous system | PATO:0000592 | Decreased thickness |
|         |     |             |                             | ZFA:0000008 | Brain                  | PATO:0001450 | Edematous           |
|         |     |             |                             | ZFA:0000114 | Heart                  | PATO:0000460 | Abnormal            |

# CNOT1

|   |                    |                                                                                                                                                                                                                                                                                             |                                                                                                                                                                                                                                                                                                                                                                                                       |
|---|--------------------|---------------------------------------------------------------------------------------------------------------------------------------------------------------------------------------------------------------------------------------------------------------------------------------------|-------------------------------------------------------------------------------------------------------------------------------------------------------------------------------------------------------------------------------------------------------------------------------------------------------------------------------------------------------------------------------------------------------|
| a | Proband phenotypes | Specific learning disability<br>Autism spectrum disorder<br>Short stature<br>Feeding difficulties in infancy<br>Ligamentous laxity<br>Epicanthus<br>Choroid plexus cyst<br>Patent ductus arteriosus<br>Short palm<br>Bilateral single transverse palmar creases<br>Microtia<br>Narrow mouth | Generalized neonatal hypotonia<br>Generalized joint laxity<br>Micrognathia<br>Wide nasal bridge<br>Epicanthus<br>Low-set ears<br>Narrow nasal ridge<br>Small chin<br>Finger syndactyly<br>Toe syndactyly<br>Abnormality of limb bone morphology<br>Abnormality of the eye<br>Global developmental delay<br>Hypotelorism<br>Abnormality of the esophagus<br>Unsteady gait<br>Abnormality of the nipple |
|   | Inheritance        | de novo                                                                                                                                                                                                                                                                                     | de novo                                                                                                                                                                                                                                                                                                                                                                                               |
|   | Consequence        | stop_gained                                                                                                                                                                                                                                                                                 | missense_variant                                                                                                                                                                                                                                                                                                                                                                                      |
|   | Position           | Chr16:g.58633145 G>A                                                                                                                                                                                                                                                                        | Chr16:g.58555172 G>A                                                                                                                                                                                                                                                                                                                                                                                  |
|   | Gene ID            | ENSG00000125107                                                                                                                                                                                                                                                                             | ENSG00000125107                                                                                                                                                                                                                                                                                                                                                                                       |
|   | Transcript change  | ENST00000317147.5:c.97C>T                                                                                                                                                                                                                                                                   | ENST00000317147.5:c.6967C>T                                                                                                                                                                                                                                                                                                                                                                           |
|   | Protein change     | ENSP00000320949.5:p.Gln33Ter                                                                                                                                                                                                                                                                | ENSP00000320949.5:p.Leu2323Phe                                                                                                                                                                                                                                                                                                                                                                        |

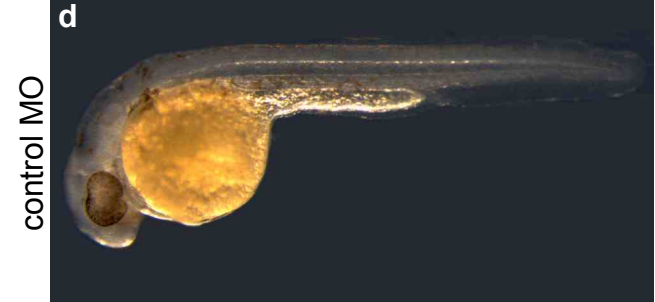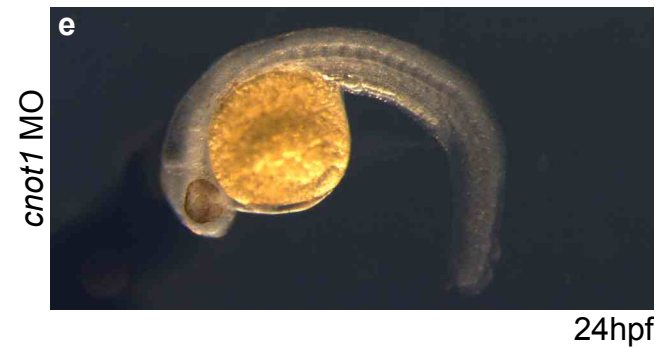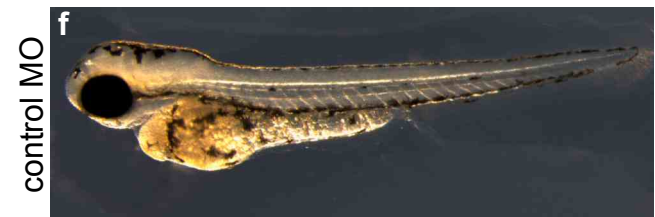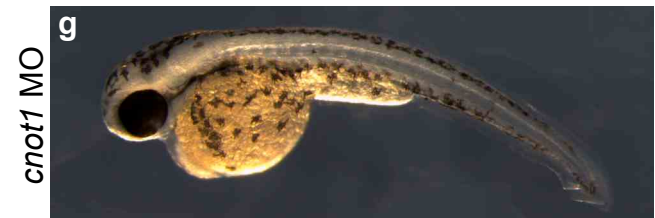

|                        |                           |
|------------------------|---------------------------|
| b                      |                           |
| Zebrafish              |                           |
| Gene                   | <i>cnot1</i>              |
| Gene ID                | ENSDARG00000004174        |
| Morpholino             | TGTTGCTGCCACTGAACTTACATGT |
| Knockdown confirmation | RT-PCR                    |
| Relevant phenotypes    | Growth delay              |
| Phenotypic concordance | Weak                      |

| c    |     | MO dose     | Stage                       | Entity      |              | Quality      |                  |
|------|-----|-------------|-----------------------------|-------------|--------------|--------------|------------------|
| high | 6ng | ZFS:0000029 | day 1: Prim-5               | ZFA:0001094 | Whole embryo | PATO:0000587 | Decreased size   |
|      |     |             |                             | ZFA:0000051 | Otic vesicle | PATO:0000587 | Decreased size   |
|      |     |             |                             | ZFA:0000051 | Otic vesicle | PATO:0000646 | Malformed        |
|      |     |             |                             | ZFA:0001115 | Trunk        | PATO:0001469 | Curved ventral   |
| high | 6ng | ZFS:0000033 | Hatching: Long-pec (48 hpf) | ZFA:0000092 | Axis         | PATO:0000574 | Decreased length |
|      |     |             |                             | ZFA:0000051 | Otic vesicle | PATO:0000646 | Malformed        |

# DDX3X

|                    |                                                                          |                                             |                                                                                                                                                          |                                                                                                                                                                                                                                                |                               |
|--------------------|--------------------------------------------------------------------------|---------------------------------------------|----------------------------------------------------------------------------------------------------------------------------------------------------------|------------------------------------------------------------------------------------------------------------------------------------------------------------------------------------------------------------------------------------------------|-------------------------------|
| Proband phenotypes | Moderately short stature<br>Microcephaly<br>Specific learning disability | Ovarian cysts<br>Global developmental delay | Intellectual disability severe<br>Hyperactivity<br>Ligamentous laxity<br>Recurrent infections<br>Poor motor coordination<br>Sleep-wake cycle disturbance | Palmoplantar hyperkeratosis<br>Global developmental delay<br>Oral cleft<br>Bilateral cleft lip and palate<br>Ectopic anus<br>Vesicoureteral reflux<br>Conductive hearing impairment<br>Sensorineural hearing impairment<br>Joint hypermobility |                               |
|                    | Inheritance                                                              | de novo                                     | de novo                                                                                                                                                  | de novo                                                                                                                                                                                                                                        |                               |
|                    | Consequence                                                              | stop_gained                                 | missense_variant                                                                                                                                         | missense_variant                                                                                                                                                                                                                               | missense_variant              |
|                    | Position                                                                 | ChrX:g.41198321 C>T                         | ChrX:g.41202566 T>C                                                                                                                                      | ChrX:g.41204533 C>T                                                                                                                                                                                                                            | ChrX:g.41205861 G>A           |
|                    | Gene ID                                                                  | ENSG00000215301                             | ENSG00000215301                                                                                                                                          | ENSG00000215301                                                                                                                                                                                                                                | ENSG00000215301               |
|                    | Transcript change                                                        | ENST00000399959.2:c.136C>T                  | ENST00000399959.2:c.641T>C                                                                                                                               | ENST00000399959.2:c.1126C>T                                                                                                                                                                                                                    | ENST00000399959.2:c.1601G>A   |
|                    | Protein change                                                           | ENSP00000382840.2:p.Arg46Ter                | ENSP00000382840.2:p.Ile214Thr                                                                                                                            | ENSP00000382840.2:p.Arg376Cys                                                                                                                                                                                                                  | ENSP00000382840.2:p.Arg534His |

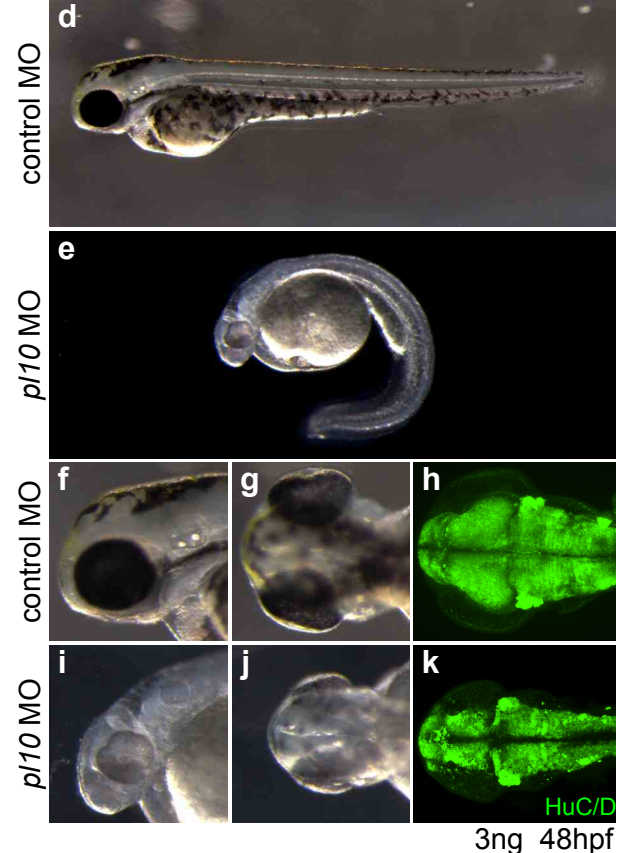

|                        |                                                                                                                |
|------------------------|----------------------------------------------------------------------------------------------------------------|
| Zebrafish              |                                                                                                                |
| Gene                   | <i>p/10</i>                                                                                                    |
| Gene ID                | ENSDARG00000005774                                                                                             |
| Morpholino             | TGAGGAACAGAACTCACTTCCAGT                                                                                       |
| Knockdown confirmation | RT-PCR, 2nd Morpholino                                                                                         |
| Relevant phenotypes    | Reduced head size(-23.1%, $p < 1.8 \times 10^{-5}$ )<br>Reduced brain size(-27.4%, $p < 7.8 \times 10^{-10}$ ) |
| Phenotypic concordance | Strong                                                                                                         |

| MO dose |     | Stage       |                             | Entity      |              | Quality      |                  |
|---------|-----|-------------|-----------------------------|-------------|--------------|--------------|------------------|
| high    | 6ng | ZFS:0000033 | Hatching: Long-pec (48 hpf) | ZFA:0001094 | Whole embryo | PATO:0000587 | Decreased size   |
|         |     |             |                             | ZFA:0001114 | Head         | PATO:0000587 | Decreased size   |
|         |     |             |                             | ZFA:0000092 | Axis         | PATO:0000574 | Decreased length |
|         |     |             |                             | ZFA:0000107 | Eye          | PATO:0000587 | Decreased size   |
|         |     |             |                             | ZFA:0000107 | Eye          | PATO:0000460 | Abnormal         |
|         |     |             |                             | ZFA:0001115 | Trunk        | PATO:0001469 | Curved ventral   |
| low     | 3ng | ZFS:0000033 | Hatching: Long-pec (48 hpf) | ZFA:0000107 | Eye          | PATO:0000587 | Decreased size   |
|         |     |             |                             | ZFA:0001114 | Head         | PATO:0000587 | Decreased size   |
|         |     |             |                             | ZFA:0000107 | Eye          | PATO:0000587 | Decreased size   |
|         |     |             |                             | ZFA:0001115 | Trunk        | PATO:0001469 | Curved ventral   |
|         |     |             |                             | ZFA:0000054 | Pericardium  | PATO:0001450 | Edematous        |
|         |     |             |                             | ZFA:0000008 | Brain        | PATO:0000587 | Decreased size   |

# DPEP2

**a**

|                    |                                                                                                                               |
|--------------------|-------------------------------------------------------------------------------------------------------------------------------|
| Proband phenotypes | Global developmental delay<br>Severe intrauterine growth retardation<br>Peters anomaly<br>Severe postnatal growth retardation |
| Inheritance        | Autosomal recessive homozygous                                                                                                |
| Consequence        | stop_gained                                                                                                                   |
| Position           | Chr16:g.68025998 A>C                                                                                                          |
| Gene ID            | ENSG00000167261                                                                                                               |
| Transcript change  | ENST00000575203.1:c.489T>G                                                                                                    |
| Protein change     | ENSP00000459375.1:p.Tyr163Ter                                                                                                 |

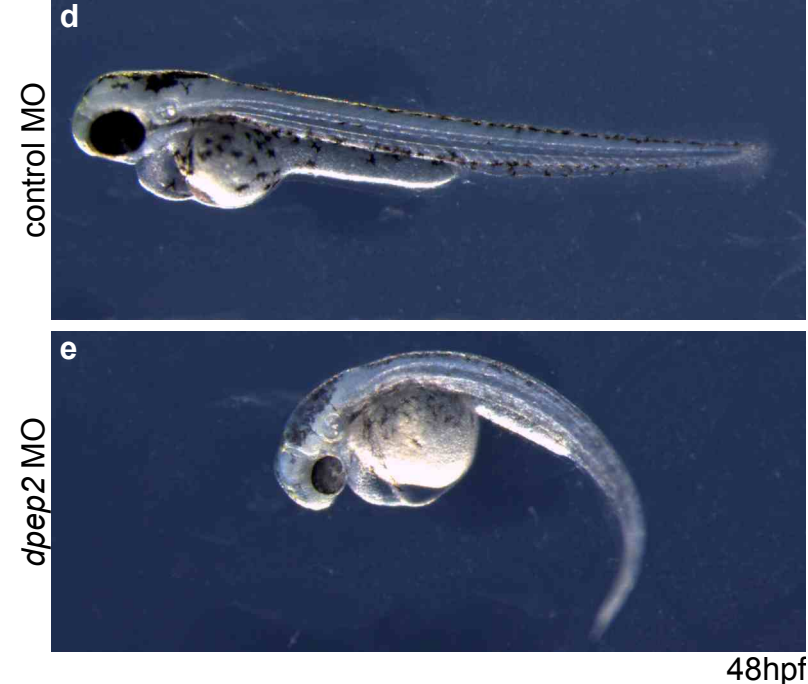

**b**

|                        |                                   |
|------------------------|-----------------------------------|
| Zebrafish              |                                   |
| Gene                   | <i>dpep2</i>                      |
| Gene ID                | ENSDARG00000079216                |
| Morpholino             | AAGTAGGAGAATTTACCTGACCTCC         |
| Knockdown confirmation | RT-PCR, 2nd Morpholino            |
| Relevant phenotypes    | Arrested/reduced embryonic growth |
| Phenotypic concordance | Moderate                          |

**c**

| MO dose |     | Stage       |                             | Entity      |             | Quality      |                     |
|---------|-----|-------------|-----------------------------|-------------|-------------|--------------|---------------------|
| high    | 6ng | ZFS:0000033 | Hatching: Long-pec (48 hpf) | ZFA:0001114 | Head        | PATO:0000587 | Decreased size      |
|         |     |             |                             | ZFA:0000107 | Eye         | PATO:0000587 | Decreased size      |
|         |     |             |                             | ZFA:0001115 | Trunk       | PATO:0000587 | Decreased size      |
|         |     |             |                             | ZFA:0001115 | Trunk       | PATO:0001469 | Curved ventral      |
|         |     |             |                             | ZFA:0001115 | Trunk       | PATO:0000592 | Decreased thickness |
|         |     |             |                             | ZFA:0000054 | Pericardium | PATO:0001450 | Edematous           |

## DTWD2

**a**

|                    |                                                                                                                                                                 |
|--------------------|-----------------------------------------------------------------------------------------------------------------------------------------------------------------|
| Proband phenotypes | Intellectual disability<br>Seizures<br>Prominent metopic ridge<br>Dental crowding<br>Abnormal hair whorl<br>Specific learning disability<br>Aggressive behavior |
| Inheritance        | de novo                                                                                                                                                         |
| Consequence        | stop_gained                                                                                                                                                     |
| Position           | Chr5:g.118264282 G>A                                                                                                                                            |
| Gene ID            | ENSG00000169570                                                                                                                                                 |
| Transcript change  | ENST00000304058.4:c.349C>T                                                                                                                                      |
| Protein change     | ENSP00000302892.4:p.Gln117Ter                                                                                                                                   |

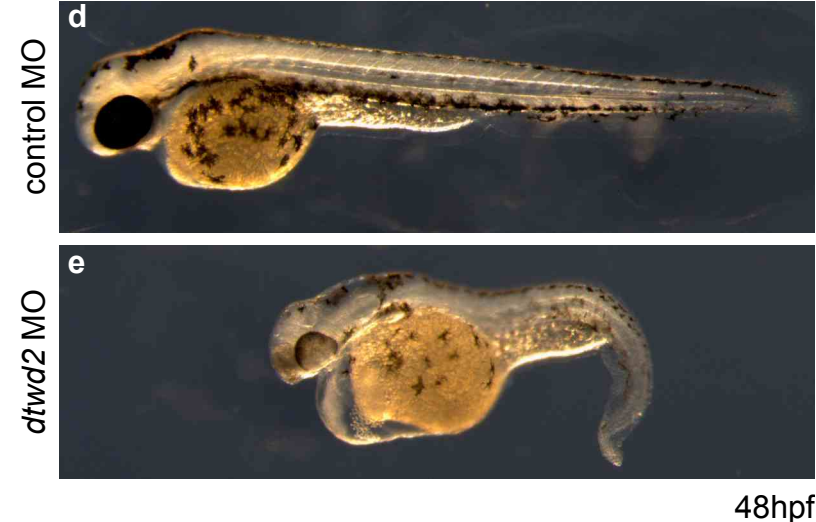

**b**

|                        |                            |
|------------------------|----------------------------|
| Zebrafish              |                            |
| Gene                   | <i>dtwd2</i>               |
| Gene ID                | ENSDARG00000096425         |
| Morpholino             | ACTATACACACACTGACCTCAGC    |
| Knockdown confirmation | RT-PCR                     |
| Relevant phenotypes    | Severe multisystem defects |
| Phenotypic concordance | Weak                       |

**c**

| MO dose |     | Stage       |                             | Entity      |              | Quality      |                  |
|---------|-----|-------------|-----------------------------|-------------|--------------|--------------|------------------|
| high    | 6ng | ZFS:0000033 | Hatching: Long-pec (48 hpf) | ZFA:0001094 | Whole embryo | PATO:0000638 | Apoptotic        |
| medium  | 4ng | ZFS:0000029 | day 1: Prim-5               | ZFA:0000155 | Somite       | PATO:0000460 | Abnormal         |
|         |     |             |                             | ZFA:0000092 | Axis         | PATO:0000574 | Decreased length |
|         |     |             |                             | ZFA:0001114 | Head         | PATO:0000460 | Abnormal         |
| low     | 3ng | ZFS:0000033 | Hatching: Long-pec (48 hpf) | ZFA:0001094 | Whole embryo | PATO:0000587 | Decreased size   |
|         |     |             |                             | ZFA:0001115 | Trunk        | PATO:0000617 | Bent             |
|         |     |             |                             | ZFA:0000155 | Somite       | PATO:0000460 | Abnormal         |

# ETF1

|                    |                               |
|--------------------|-------------------------------|
| Proband phenotypes | Global developmental delay    |
|                    | Restrictive behavior          |
|                    | Absence seizures              |
|                    | Progressive microcephaly      |
|                    | Broad-based gait              |
|                    | Sleep-wake cycle disturbance  |
|                    | Hypertelorism                 |
| Epicanthus         |                               |
| Wide mouth         |                               |
| Atonic seizures    |                               |
| Inheritance        | de novo                       |
| Consequence        | splice_donor_variant          |
| Position           | Chr5:g.137848452 C>T          |
| Gene ID            | ENSG00000120705               |
| Transcript change  | ENST00000512198.1:c.*304+1G>A |
| Protein change     | ENSP00000422272               |

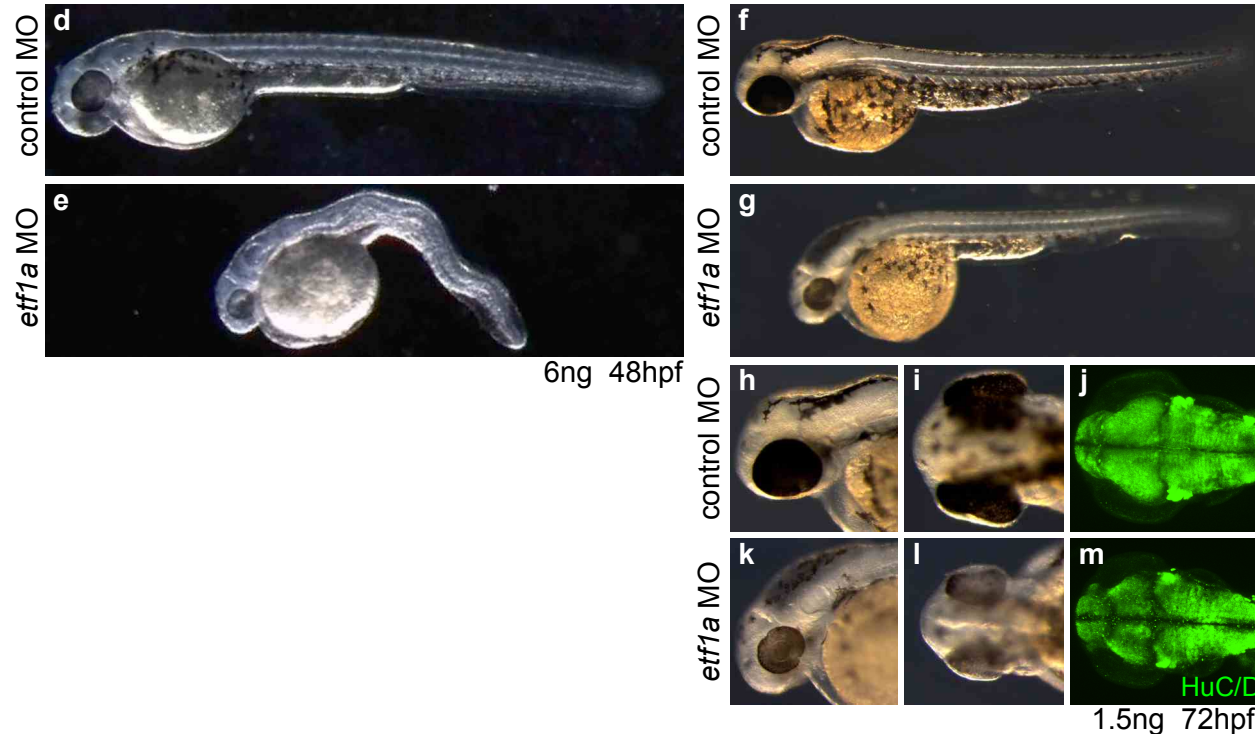

|                        |                                                                                                     |
|------------------------|-----------------------------------------------------------------------------------------------------|
| Zebrafish              |                                                                                                     |
| Gene                   | <i>eff1(a)</i>                                                                                      |
| Gene ID                | ENSDARG00000043976                                                                                  |
| Morpholino             | TATGAGAGAACCAGCCTCACCTCT                                                                            |
| Knockdown confirmation | RT-PCR                                                                                              |
| Relevant phenotypes    | Reduced head size(-11.5%, $p < 2.3 \times 10^{-5}$ )<br>Reduced brain size(-13.4%, $p < 0.000014$ ) |
| Phenotypic concordance | Strong                                                                                              |

| MO dose |       | Stage       |                             | Entity      |                        | Quality      |                     |
|---------|-------|-------------|-----------------------------|-------------|------------------------|--------------|---------------------|
| high    | 6ng   | ZFS:0000029 | day 1: Prim-5               | ZFA:0001094 | Whole embryo           | PATO:0000460 | Abnormal            |
| medium  | 3ng   | ZFS:0000029 | day 1: Prim-5               | ZFA:0001094 | Whole embryo           | PATO:0000587 | Decreased size      |
|         |       |             |                             | ZFA:0001115 | Trunk                  | PATO:0001469 | Curved ventral      |
|         |       |             |                             | ZFA:0000135 | Notocord               | PATO:0000617 | Bent                |
|         |       |             |                             | ZFA:0000012 | Central nervous system | PATO:0000592 | Decreased thickness |
|         |       |             |                             | ZFA:0000155 | Somite                 | PATO:0000460 | Abnormal            |
| low     | 1.5ng | ZFS:0000033 | Hatching: Long-pec (48 hpf) | ZFA:0001114 | Head                   | PATO:0000587 | Decreased size      |
|         |       |             |                             | ZFA:0000107 | Eye                    | PATO:0000587 | Decreased size      |
|         |       |             |                             | ZFA:0000008 | Brain                  | PATO:0000587 | Decreased size      |
| low     | 1.5ng | ZFS:0000035 | day 3: Protruding-mouth     | ZFA:0001114 | Head                   | PATO:0000587 | Decreased size      |
|         |       |             |                             | ZFA:0000107 | Eye                    | PATO:0000587 | Decreased size      |

# FRYL

**a**

|                    |                                                                                      |
|--------------------|--------------------------------------------------------------------------------------|
| Proband phenotypes | Moderately short stature<br>Abnormal facial shape<br>Abnormality of the heart valves |
| Inheritance        | de novo                                                                              |
| Consequence        | stop_gained                                                                          |
| Position           | Chr4:g.48542544 G>A                                                                  |
| Gene ID            | ENSG00000075539                                                                      |
| Transcript change  | ENST00000537810.1:c.6121C>T                                                          |
| Protein change     | ENSP00000441114.1:p.Arg2041Ter                                                       |

**b**

|                        |                                                                                         |
|------------------------|-----------------------------------------------------------------------------------------|
| Zebrafish              |                                                                                         |
| Gene                   | <i>fryl</i>                                                                             |
| Gene ID                | ENSDARG00000040001                                                                      |
| Morpholino             | GTATCAGGTCTCCTCACCCCTTTGGA                                                              |
| Knockdown confirmation | RT-PCR, 2nd Morpholino                                                                  |
| Relevant phenotypes    | Cardiac and craniofacial defects<br>Reduced body axis (-7.6%, $p=3.25 \times 10^{-5}$ ) |
| Phenotypic concordance | Strong                                                                                  |

**c**

| MO dose |     | Stage       |                             | Entity      |             | Quality      |                  |
|---------|-----|-------------|-----------------------------|-------------|-------------|--------------|------------------|
| high    | 6ng | ZFS:0000033 | Hatching: Long-pec (48 hpf) | ZFA:0000092 | Axis        | PATO:0000574 | Decreased length |
|         |     |             |                             | ZFA:0000054 | Pericardium | PATO:0001450 | Edematous        |
|         |     |             |                             | ZFA:0000114 | Heart       | PATO:0000460 | Abnormal         |
| high    | 6ng | ZFS:0000035 | day 3: Protruding-mouth     | ZFA:0001114 | Head        | PATO:0000646 | Malformed        |
|         |     |             |                             | ZFA:0000054 | Pericardium | PATO:0001450 | Edematous        |
|         |     |             |                             | ZFA:0000114 | Heart       | PATO:0000460 | Abnormal         |

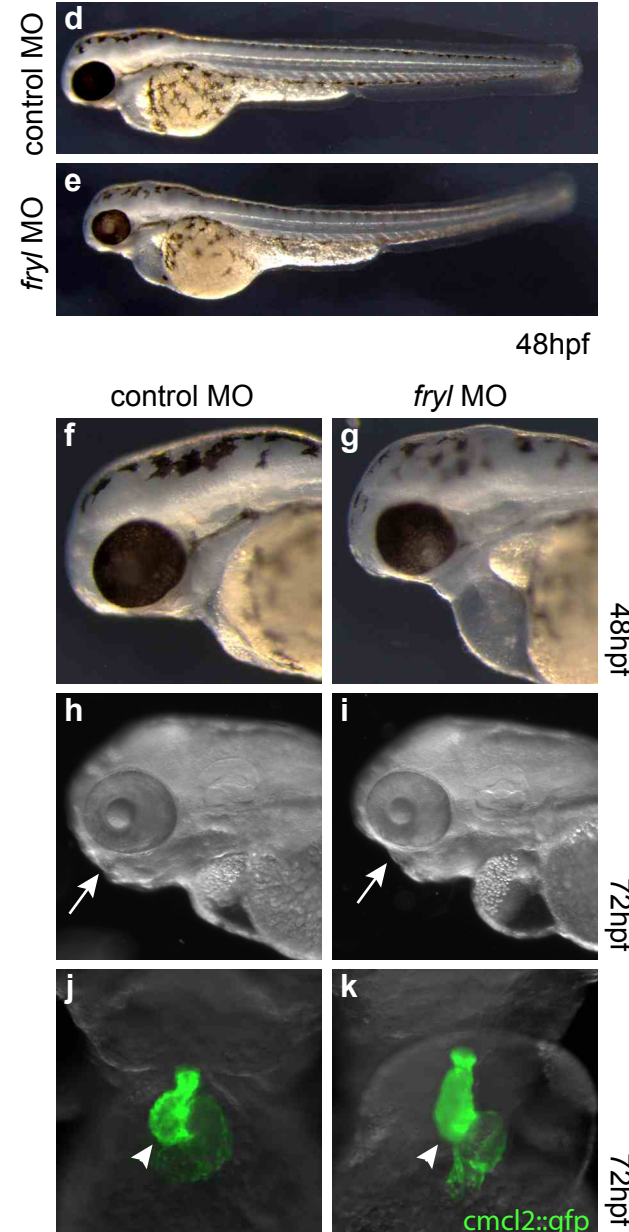



# ILVBL

|   |                    |                                                                                                                                           |
|---|--------------------|-------------------------------------------------------------------------------------------------------------------------------------------|
| a | Proband phenotypes | Genu valgum<br>Hyperlordosis<br>Constipation<br>Global developmental delay<br>Hypermetropia<br>Abnormal facial shape<br>Cafe-au-lait spot |
|   | Inheritance        | de novo                                                                                                                                   |
|   | Consequence        | stop_gained                                                                                                                               |
|   | Position           | Chr19:g.15226974 C>T                                                                                                                      |
|   | Gene ID            | ENSG00000105135                                                                                                                           |
|   | Transcript change  | ENST00000263383.3:c.1460G>A                                                                                                               |
|   | Protein change     | ENSP00000263383.3:p.Trp487Ter                                                                                                             |

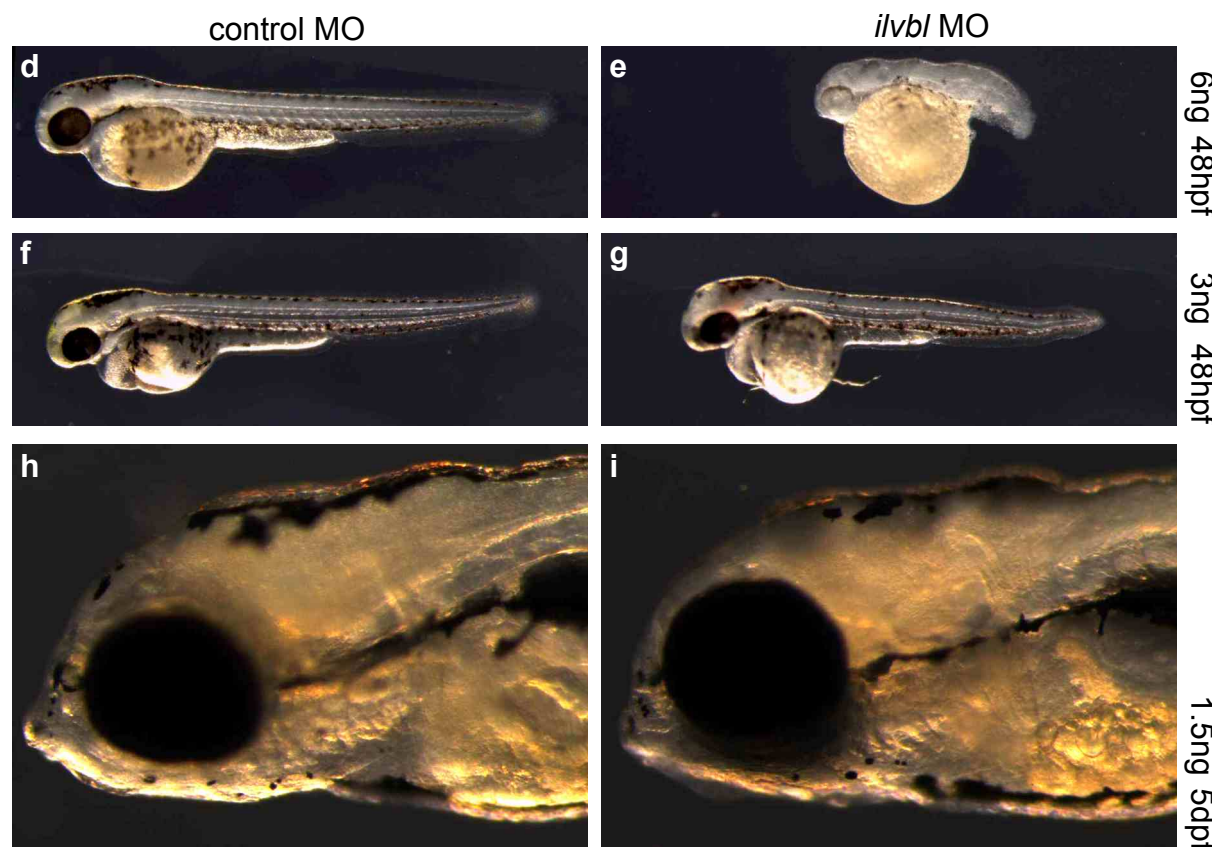

|                        |                                                                     |
|------------------------|---------------------------------------------------------------------|
| b                      | Zebrafish                                                           |
| Gene                   | <i>ilvbl</i>                                                        |
| Gene ID                | ENSDARG00000017126                                                  |
| Morpholino             | GCTGTTTGGGTTTAGTCTTACCAGA                                           |
| Knockdown confirmation | RT-PCR                                                              |
| Relevant phenotypes    | Severe multisystem defects<br>Craniofacial defects at lower MO dose |
| Phenotypic concordance | Weak                                                                |

| c      |       | MO dose     |                             | Stage       |              | Entity       |                  | Quality |  |
|--------|-------|-------------|-----------------------------|-------------|--------------|--------------|------------------|---------|--|
| high   | 6ng   | ZFS:0000029 | day 1: Prim-5               | ZFA:0001094 | Whole embryo | PATO:0000638 | Apoptotic        |         |  |
|        |       |             |                             | ZFA:0001094 | Whole embryo | PATO:0000587 | Decreased size   |         |  |
|        |       |             |                             | ZFA:0001115 | Trunk        | PATO:0000462 | Absent           |         |  |
| high   | 6ng   | ZFS:0000033 | Hatching: Long-pec (48 hpf) | ZFA:0001115 | Trunk        | PATO:0000646 | Malformed        |         |  |
|        |       |             |                             | ZFA:0001114 | Head         | PATO:0000646 | Malformed        |         |  |
| medium | 3ng   | ZFS:0000033 | Hatching: Long-pec (48 hpf) | ZFA:0001114 | Head         | PATO:0001450 | Edematous        |         |  |
|        |       |             |                             | ZFA:0000092 | Axis         | PATO:0000574 | Decreased length |         |  |
|        |       |             |                             | ZFA:0001114 | Head         | PATO:0000646 | Malformed        |         |  |
| low    | 1.5ng | ZFS:0000037 | Larval: Day 5               | ZFA:0001114 | Head         | PATO:0000646 | Malformed        |         |  |

## NONO

|                    |                                                                                                                                                                                     |                                                                                                                                                                                                  |
|--------------------|-------------------------------------------------------------------------------------------------------------------------------------------------------------------------------------|--------------------------------------------------------------------------------------------------------------------------------------------------------------------------------------------------|
| Proband phenotypes | Intellectual disability<br>Neonatal hypotonia<br>Joint hypermobility<br>Bilateral sensorineural hearing impairment<br>Myopia<br>Abnormality of vision<br>Bifid uvula<br>High palate | Misalignment of teeth<br>Feeding difficulties in infancy<br>Bruising susceptibility<br>Urinary incontinence<br>Nystagmus<br>Intrauterine growth retardation<br>Hypoplasia of the corpus callosum |
| Inheritance        | de novo                                                                                                                                                                             |                                                                                                                                                                                                  |
| Consequence        | stop_gained                                                                                                                                                                         |                                                                                                                                                                                                  |
| Position           | ChrX:g.70517750 C>T                                                                                                                                                                 |                                                                                                                                                                                                  |
| Gene ID            | ENSG00000147140                                                                                                                                                                     |                                                                                                                                                                                                  |
| Transcript change  | ENST00000535149.1:c.826C>T                                                                                                                                                          |                                                                                                                                                                                                  |
| Protein change     | ENSP00000441364.1:p.Arg276Ter                                                                                                                                                       |                                                                                                                                                                                                  |

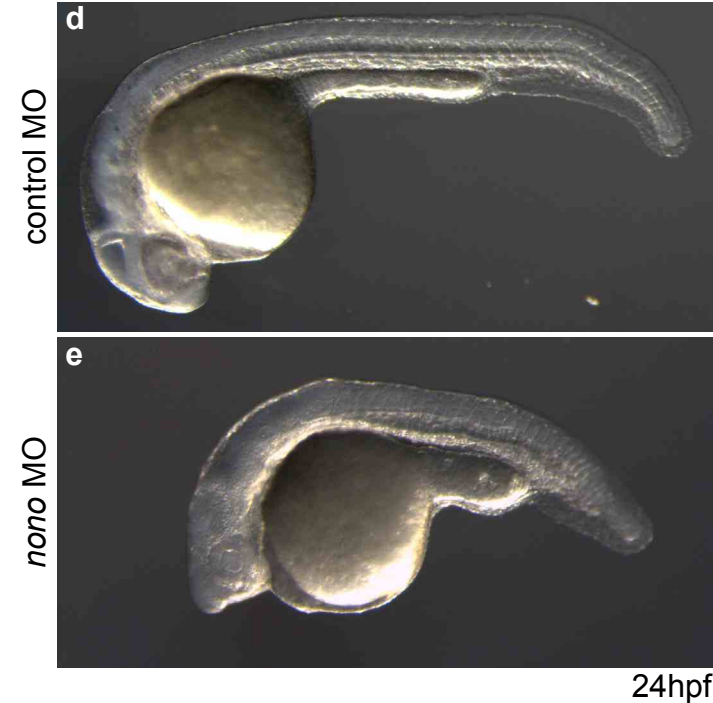

|                        |                                                             |
|------------------------|-------------------------------------------------------------|
| Zebrafish              |                                                             |
| Gene                   | <i>nono</i>                                                 |
| Gene ID                | ENSDARG00000020482                                          |
| Morpholino             | TGACGCCTAACCAAACCTCACCAGCC                                  |
| Knockdown confirmation | RT-PCR                                                      |
| Relevant phenotypes    | Severe multisystem defects including ear and growth defects |
| Phenotypic concordance | Weak                                                        |

| MO dose     |        | Stage        |                | Entity      |                        | Quality      |                     |
|-------------|--------|--------------|----------------|-------------|------------------------|--------------|---------------------|
| high        | 6ng    | ZFS:0000029  | day 1: Prim-5  | ZFA:0001094 | Whole embryo           | PATO:0000638 | Apoptotic           |
| medium      | 3ng    | ZFS:0000029  | day 1: Prim-5  |             | Development            | PATO:0000297 | Arrested            |
|             |        |              |                | ZFA:0000155 | Somite                 | PATO:0000462 | Absent              |
|             |        |              |                | ZFA:0000012 | Central nervous system | PATO:0000587 | Decreased size      |
|             |        |              |                | ZFA:0000008 | Brain                  | PATO:0000587 | Decreased size      |
| low         | 1ng    | ZFS:0000029  | day 1: Prim-5  | ZFA:0001094 | Whole embryo           | PATO:0000460 | Abnormal            |
|             |        |              |                | ZFA:0000092 | Axis                   | PATO:0000574 | Decreased length    |
|             |        |              |                | ZFA:0001114 | Head                   | PATO:0000587 | Decreased size      |
|             |        |              |                | ZFA:0000051 | Otic vesicle           | PATO:0000587 | Decreased size      |
|             |        |              |                | ZFA:0000008 | Brain                  | PATO:0000587 | Decreased size      |
|             |        |              |                | ZFA:0000054 | Pericardium            | PATO:0000587 | Decreased size      |
|             |        |              |                | ZFA:0001115 | Trunk                  | PATO:0000591 | Increased thickness |
|             |        |              |                | ZFA:0001115 | Trunk                  | PATO:0000574 | Decreased length    |
| ZFA:0000155 | Somite | PATO:0000460 | Abnormal       |             |                        |              |                     |
| ZFA:0000107 | Eye    | PATO:0000587 | Decreased size |             |                        |              |                     |

# PKN2

|   |                    |                                                                                                                                                                                                                                               |                                                                                                                                                                              |  |
|---|--------------------|-----------------------------------------------------------------------------------------------------------------------------------------------------------------------------------------------------------------------------------------------|------------------------------------------------------------------------------------------------------------------------------------------------------------------------------|--|
| a | Proband phenotypes | Muscular subaortic stenosis<br>Proximal aortic coarctation<br>Hypospadias<br>Isolated growth hormone deficiency<br>Bilateral sensorineural deafness<br>Spina bifida occulta at l5 or s1<br>Upslanting palpebral fissures<br>Mild micrognathia | Thick everted lower lip<br>Thin upper lip<br>Broad nose<br>Arched sparse eyebrows<br>Fleshy earlobes<br>Small hands<br>Inguinal hernia<br>Mild-to-moderate growth deficiency |  |
|   | Inheritance        | de novo                                                                                                                                                                                                                                       |                                                                                                                                                                              |  |
|   | Consequence        | missense_variant                                                                                                                                                                                                                              |                                                                                                                                                                              |  |
|   | Position           | Chr1:g.89270569 T>C                                                                                                                                                                                                                           |                                                                                                                                                                              |  |
|   | Gene ID            | ENSP00000317851                                                                                                                                                                                                                               |                                                                                                                                                                              |  |
|   | Transcript change  | ENST00000316005.7:c.1466T>C                                                                                                                                                                                                                   |                                                                                                                                                                              |  |
|   | Protein change     | ENSP00000317851.7:p.Leu489Pro                                                                                                                                                                                                                 |                                                                                                                                                                              |  |
|   |                    |                                                                                                                                                                                                                                               |                                                                                                                                                                              |  |
|   |                    |                                                                                                                                                                                                                                               |                                                                                                                                                                              |  |
|   |                    |                                                                                                                                                                                                                                               |                                                                                                                                                                              |  |

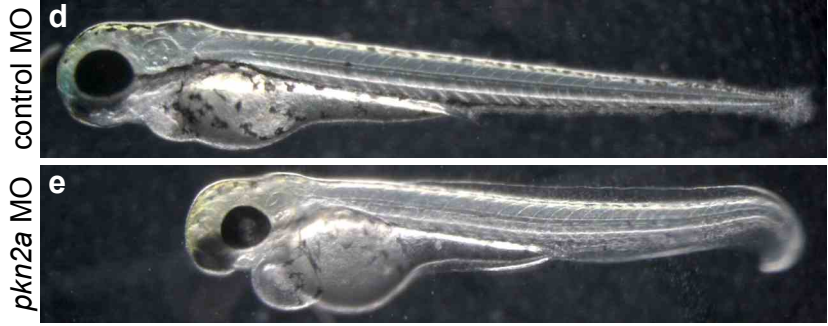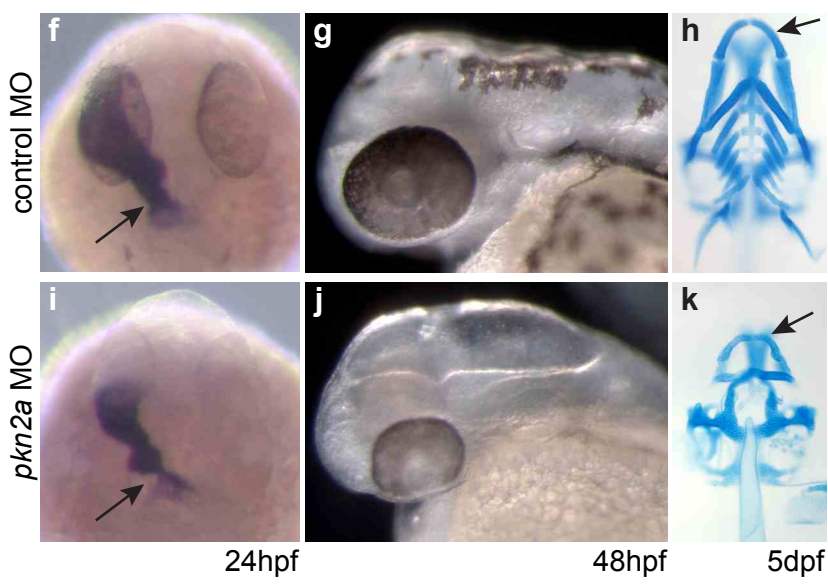

|                        |                                                     |
|------------------------|-----------------------------------------------------|
| b                      | Zebrafish                                           |
| Gene                   | <i>pkn2 (pkn2a)</i>                                 |
| Gene ID                | ENSDARG00000006705                                  |
| Morpholino             | AGCTTTACTCATACCCAAGAGAAGA                           |
| Knockdown confirmation | RT-PCR, 2nd Morpholino                              |
| Relevant phenotypes    | Cardiac, craniofacial cartilage, and growth defects |
| Phenotypic concordance | Strong                                              |

| MO dose |       | Stage       |                             | Entity      |                         | Quality      |                  |
|---------|-------|-------------|-----------------------------|-------------|-------------------------|--------------|------------------|
| high    | 6ng   | ZFS:0000033 | Hatching: Long-pec (48 hpf) | ZFA:0009091 | melanocyte              | PATO:0001997 | Decreased number |
|         |       |             |                             | ZFA:0000107 | Eye                     | PATO:0000587 | Decreased size   |
|         |       |             |                             | ZFA:0000008 | Brain                   | PATO:0001450 | Edematous        |
|         |       |             |                             | ZFA:0000054 | Pericardium             | PATO:0001450 | Edematous        |
|         |       |             |                             | ZFA:0000114 | Heart                   | PATO:0000460 | Abnormal         |
| high    | 6ng   | ZFS:0000035 | day 3: Protruding-mouth     | ZFA:0001114 | Head                    | PATO:0000460 | Abnormal         |
|         |       |             |                             | ZFA:0001114 | Head                    | PATO:0000587 | Decreased size   |
|         |       |             |                             | ZFA:0000092 | Axis                    | PATO:0000574 | Decreased length |
|         |       |             |                             | ZFA:0001115 | Trunk                   | PATO:0001469 | Curved ventral   |
|         |       |             |                             | ZFA:0000054 | Pericardium             | PATO:0001450 | Edematous        |
|         |       |             |                             | ZFA:0000114 | Heart                   | PATO:0000460 | Abnormal         |
| high    | 6ng   | ZFS:0000037 | Larval: Day 5               | ZFA:0001114 | Head                    | PATO:0000646 | Malformed        |
| medium  | 4.5ng | ZFS:0000037 | Larval: Day 5               | ZFA:0001458 | Cranial cartilage       | PATO:0000462 | Absent           |
|         |       |             |                             | ZFA:0001458 | Cranial cartilage       | PATO:0000587 | Decreased size   |
|         |       |             |                             | ZFA:0001273 | Ventral mandibular arch | PATO:0000587 | Decreased size   |

# POGZ

|                    |                                                                                                                                                                                                                                                                                                                |                                                                                                                                            |
|--------------------|----------------------------------------------------------------------------------------------------------------------------------------------------------------------------------------------------------------------------------------------------------------------------------------------------------------|--------------------------------------------------------------------------------------------------------------------------------------------|
| Proband phenotypes | Bilateral sensorineural hearing impairment<br>Generalized neonatal hypotonia<br>Generalized hypotonia<br>Decreased electroretinogram (ERG) amplitude<br>Reduced amplitude of b-wave (ERG)<br>Abnormality of vision evoked potentials<br>Global developmental delay<br>Cerebral atrophy<br>Thin corpus callosum | Iris coloboma<br>Global developmental delay<br>Behavioural/Psychiatric Abnormality<br>Hypoglycemic seizure<br>Abnormality of the outer ear |
| Inheritance        | de novo                                                                                                                                                                                                                                                                                                        | de novo                                                                                                                                    |
| Consequence        | stop_gained                                                                                                                                                                                                                                                                                                    | splice_donor_variant                                                                                                                       |
| Position           | Chr1:g.151378800 A>T                                                                                                                                                                                                                                                                                           | Chr1:g.151378156 AGGG>AGG                                                                                                                  |
| Gene ID            | ENSG00000143442                                                                                                                                                                                                                                                                                                | ENSG00000143442                                                                                                                            |
| Transcript change  | ENST00000491586.1:c.2579T>A                                                                                                                                                                                                                                                                                    | ENST00000491586.1:c.3220delC                                                                                                               |
| Protein change     | ENSP00000418408.1:p.Leu860Ter                                                                                                                                                                                                                                                                                  | ENSP00000418408.1:p.Leu1075CysfsTer3                                                                                                       |

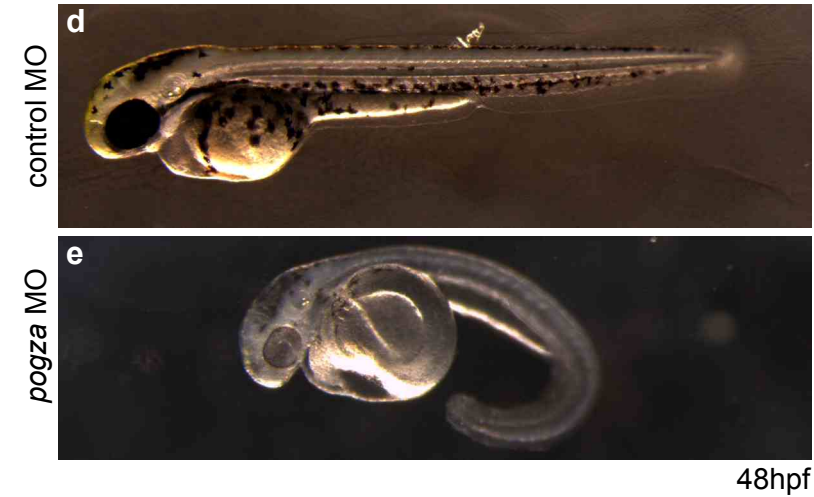

|                        |                                                  |
|------------------------|--------------------------------------------------|
| Zebrafish              |                                                  |
| Gene                   | <i>pogza</i>                                     |
| Gene ID                | ENSDARG00000054778                               |
| Morpholino             | GGTGTGGATGAAACTTACACAGAA                         |
| Relevant phenotypes    | Severe multisystem defects including CNS defects |
| Phenotypic concordance | Weak                                             |

| MO dose |     | Stage | Entity      |                             | Quality                    |              |                     |
|---------|-----|-------|-------------|-----------------------------|----------------------------|--------------|---------------------|
| high    | 6ng |       | ZFS:0000033 | Hatching: Long-pec (48 hpf) | ZFA:0001094                | Whole embryo | PATO:0000587        |
|         |     |       |             | ZFA:0001114                 | Head                       | PATO:0000587 | Decreased size      |
|         |     |       |             | ZFA:0000107                 | Eye                        | PATO:0000587 | Decreased size      |
|         |     |       |             | ZFA:0000051                 | Otic vesicle               | PATO:0000587 | Decreased size      |
|         |     |       |             | ZFA:0001115                 | Trunk                      | PATO:0001469 | Curved ventral      |
|         |     |       |             | ZFA:0000054                 | Pericardium                | PATO:0001450 | Edematous           |
|         |     |       |             | ZFA:0000008                 | Brain                      | PATO:0000587 | Decreased size      |
|         |     |       |             | ZFA:0000008                 | Brain                      | PATO:0000592 | Decreased thickness |
|         |     |       |             | ZFA:0000008                 | Brain                      | PATO:0001450 | Edematous           |
|         |     |       |             | ZFA:0009091                 | melanocyte                 | PATO:0001997 | Decreased number    |
|         |     |       |             | ZFA:0001115                 | Trunk                      | PATO:0000647 | Necrotic            |
|         |     |       |             | GO:0008345                  | Larval locomotory behavior | PATO:0000460 | Abnormal            |
|         |     |       |             | ZFA:0000084                 | yolk                       | PATO:0001450 | Edematous           |
|         |     |       |             | ZFA:0000075                 | Spinal cord                | PATO:0000587 | Decreased size      |
|         |     |       |             | ZFA:0000075                 | Spinal cord                | PATO:0000592 | Decreased thickness |

# PSD2

|   |                    |                                                                                       |
|---|--------------------|---------------------------------------------------------------------------------------|
| a | Proband phenotypes | Global developmental delay<br>Lower limb hypertonia<br>Muscular hypotonia<br>Seizures |
|   | Inheritance        | de novo                                                                               |
|   | Consequence        | splice_donor_variant                                                                  |
|   | Position           | Chr5:g.139216587 G>C                                                                  |
|   | Gene ID            | ENSG00000146005                                                                       |
|   | Transcript change  | ENST00000274710.3:c.1594+1G>C                                                         |
|   | Protein change     | ENSP00000274710                                                                       |

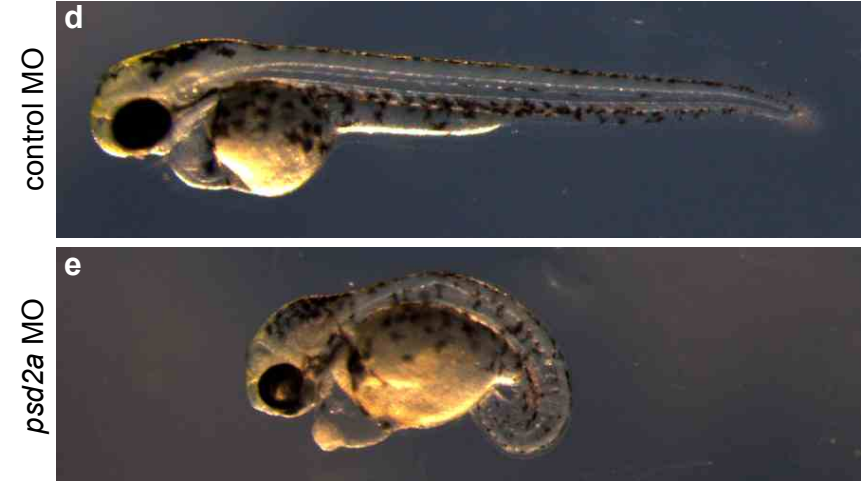

6ng 48hpf

|   |                        |                                                  |
|---|------------------------|--------------------------------------------------|
| b | Zebrafish              |                                                  |
|   | Gene                   | <i>BX005008.2 (psd2a)</i>                        |
|   | Gene ID                | ENSDARG00000063036                               |
|   | Morpholino             | TAAATGATAACTTGCCCTCTGAGGT                        |
|   | Knockdown confirmation | 2nd Morpholino                                   |
|   | Relevant phenotypes    | Abnormal musculature, locomotion and CNS defects |
|   | Phenotypic concordance | Moderate                                         |

| c    |     | MO dose     | Stage                       | Entity      | Quality                    |              |                     |
|------|-----|-------------|-----------------------------|-------------|----------------------------|--------------|---------------------|
| high | 6ng | ZFS:0000033 | Hatching: Long-pec (48 hpf) | ZFA:0000008 | Brain                      | PATO:0001450 | Edematous           |
|      |     |             |                             | ZFA:0000054 | Pericardium                | PATO:0001450 | Edematous           |
|      |     |             |                             | ZFA:0000155 | Somite                     | PATO:0000460 | Abnormal            |
|      |     |             |                             | ZFA:0001115 | Trunk                      | PATO:0001469 | Curved ventral      |
|      |     |             |                             | ZFA:0001114 | Head                       | PATO:0000587 | Decreased size      |
|      |     |             |                             | ZFA:0000107 | Eye                        | PATO:0000587 | Decreased size      |
|      |     |             |                             | GO:0008345  | Larval locomotory behavior | PATO:0000460 | Abnormal            |
|      |     |             |                             | ZFA:0001094 | Whole embryo               | PATO:0000587 | Decreased size      |
|      |     |             |                             | ZFA:0000114 | Heart                      | PATO:0000460 | Abnormal            |
|      |     |             |                             | ZFA:0000075 | Spinal cord                | PATO:0000592 | Decreased thickness |
| low  | 3ng | ZFS:0000033 | Hatching: Long-pec (48 hpf) | GO:0008345  | Larval locomotory behavior | PATO:0000460 | Abnormal            |
|      |     |             |                             | ZFA:0001114 | Head                       | PATO:0000587 | Decreased size      |
|      |     |             |                             | ZFA:0001115 | Trunk                      | PATO:0001469 | Curved ventral      |

# PSMD3

|                    |                               |                             |
|--------------------|-------------------------------|-----------------------------|
| Proband phenotypes | Microcephaly                  | Frequent candida infections |
|                    | Muscular hypotonia            | Migraine                    |
|                    | Strabismus                    | Stereotyped                 |
|                    | Gastroesophageal reflux       | repetitive behaviour        |
|                    | Constipation                  | Endocrine abnormality       |
|                    | Epilepsy                      | Growth abnormality          |
|                    | Drooling                      |                             |
| Inheritance        | de novo                       |                             |
| Consequence        | missense_variant              |                             |
| Position           | Chr17:g.38142858 C>T          |                             |
| Gene ID            | ENSG00000108344               |                             |
| Transcript change  | ENST00000264639.4:c.442C>T    |                             |
| Protein change     | ENSP00000264639.4:p.Arg148Cys |                             |

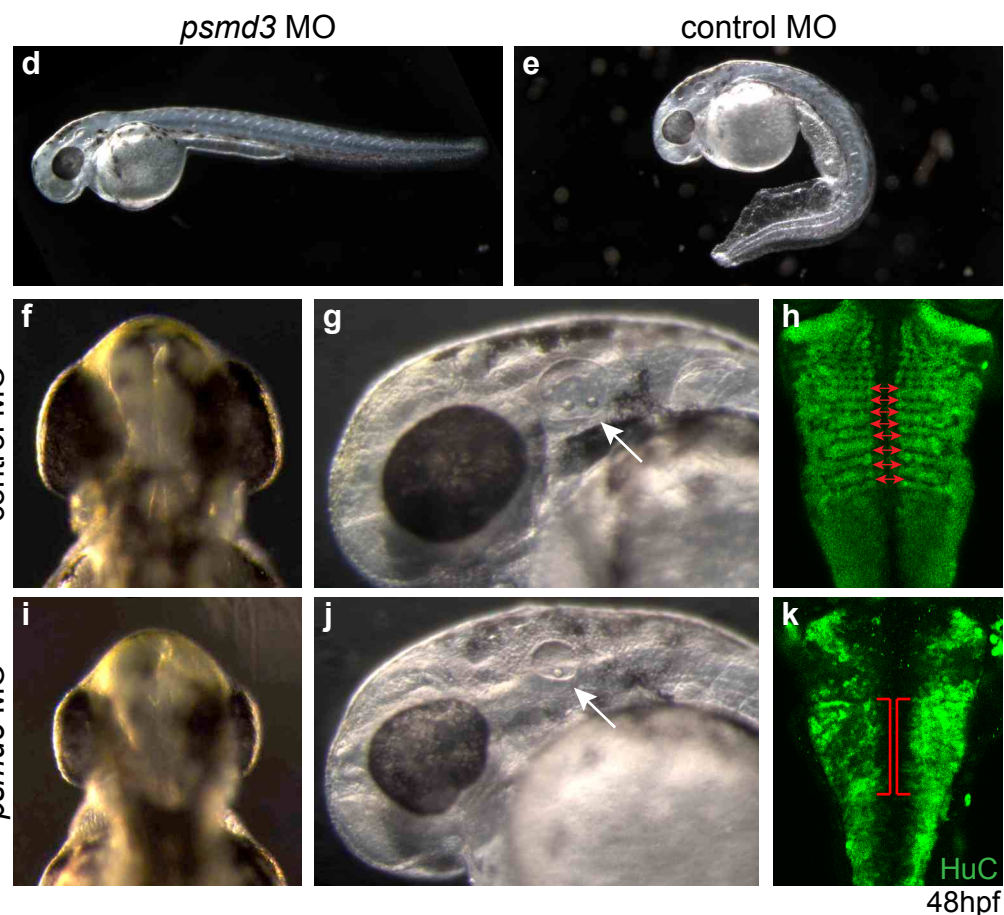

|                        |                                                                                                                       |
|------------------------|-----------------------------------------------------------------------------------------------------------------------|
| Zebrafish              |                                                                                                                       |
| Gene                   | <i>psmd3</i>                                                                                                          |
| Gene ID                | ENSDARG00000018124                                                                                                    |
| Morpholino             | CTGATGAAGGGTGTGTTTACCTGCTC                                                                                            |
| Knockdown confirmation | RT-PCR                                                                                                                |
| Relevant phenotypes    | Reduced head size(-8.9%, p<0.0005)<br>Reduced brain size(-16%, p<1.6 x 10 <sup>-5</sup> )<br>Defective CNS patterning |
| Phenotypic concordance | Strong                                                                                                                |

| MO dose     |             | Stage        |                             | Entity      |              | Quality      |                  |
|-------------|-------------|--------------|-----------------------------|-------------|--------------|--------------|------------------|
| high        | 6ng         | ZFS:0000029  | day 1: Prim-5               | ZFA:0000051 | Otic vesicle | PATO:0000587 | Decreased size   |
| high        | 6ng         | ZFS:0000033  | Hatching: Long-pec (48 hpf) | ZFA:0001114 | Head         | PATO:0000587 | Decreased size   |
|             |             |              |                             | ZFA:0000008 | Brain        | PATO:0001450 | Edematous        |
|             |             |              |                             | ZFA:0000051 | Otic vesicle | PATO:0000587 | Decreased size   |
|             |             |              |                             | ZFA:0001115 | Trunk        | PATO:0001469 | Curved ventral   |
|             |             |              |                             | ZFA:0000022 | floorplate   | PATO:0000462 | Absent           |
|             |             |              |                             | ZFA:0000008 | Brain        | PATO:0000460 | Abnormal         |
|             |             |              |                             | ZFA:0001617 | otolith      | PATO:0001997 | Decreased number |
|             |             |              |                             | ZFA:0000114 | Heart        | PATO:0000460 | Abnormal         |
| ZFA:0000054 | Pericardium | PATO:0001450 | Edematous                   |             |              |              |                  |

# SAP130

|   |                    |                                                                                                                                                                                                                                                                                |
|---|--------------------|--------------------------------------------------------------------------------------------------------------------------------------------------------------------------------------------------------------------------------------------------------------------------------|
| a | Proband phenotypes | Prominent metopic ridge<br>Craniosynostosis<br>Short sternum<br>Bifid uvula<br>Velopharyngeal insufficiency<br>Abnormality of dental enamel<br>Carios teeth<br>Patent foramen ovale<br>Infantile muscular hypotonia<br>Hypotelorism<br>Delayed speech and language development |
|   | Inheritance        | de novo                                                                                                                                                                                                                                                                        |
|   | Consequence        | stop_gained                                                                                                                                                                                                                                                                    |
|   | Position           | Chr2:g.128750773 G>A                                                                                                                                                                                                                                                           |
|   | Gene ID            | ENSG00000136715                                                                                                                                                                                                                                                                |
|   | Transcript change  | ENST00000357702.5:c.1543C>T                                                                                                                                                                                                                                                    |
|   | Protein change     | ENSP00000350333.5:p.Arg515Ter                                                                                                                                                                                                                                                  |
|   |                    |                                                                                                                                                                                                                                                                                |
|   |                    |                                                                                                                                                                                                                                                                                |
|   |                    |                                                                                                                                                                                                                                                                                |

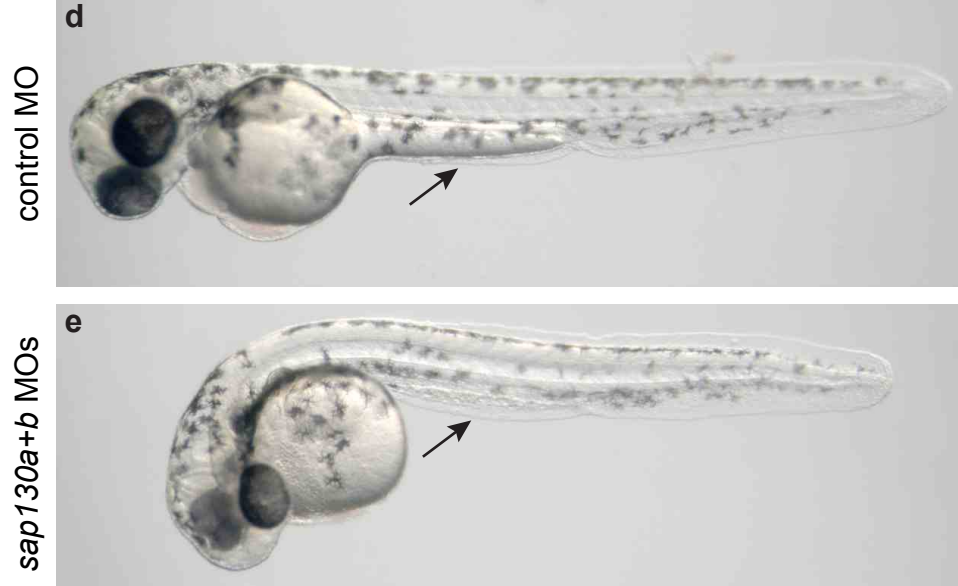

48hpf

|                        |                                         |                           |
|------------------------|-----------------------------------------|---------------------------|
| b                      |                                         |                           |
| Zebrafish              |                                         |                           |
| Gene                   | <i>sap130a</i>                          | <i>sap130b</i>            |
| Gene ID                | ENSDARG00000056924                      | ENSDARG00000079352        |
| Morpholino             | GTGTATCACTATCCTCCTACCTGAA               | ATTAAATGTGTCATAAACCTGTGCT |
| Knockdown confirmation | RT-PCR                                  | RT-PCR                    |
| Relevant phenotypes    | Abnormal locomotion in double knockdown |                           |
| Phenotypic concordance | Moderate                                |                           |

| c       |         |             |                             |             |                            |              |                     |
|---------|---------|-------------|-----------------------------|-------------|----------------------------|--------------|---------------------|
| MO dose |         |             | Stage                       | Entity      |                            | Quality      |                     |
| high    | 5ng+5ng | ZFS:0000033 | Hatching: Long-pec (48 hpf) | ZFA:0000106 | yolk extension             | PATO:0000462 | Absent              |
|         |         |             |                             | GO:0001966  | Touch response             | PATO:0000460 | Abnormal            |
|         |         |             |                             | ZFA:0001115 | Trunk                      | PATO:0001469 | Curved ventral      |
|         |         |             |                             | ZFA:0001115 | Trunk                      | PATO:0000591 | Increased thickness |
|         |         |             |                             | GO:0008345  | Larval locomotory behavior | PATO:0000460 | Abnormal            |
|         |         |             |                             | ZFA:0001114 | Head                       | PATO:0001469 | Curved ventral      |
| high    | 5ng+5ng | ZFS:0000037 | Larval: Day 5               | ZFA:0000022 | Floorplate                 | PATO:0000462 | Absent              |
|         |         |             |                             | GO:0035188  | Hatching                   | PATO:0000462 | Absent              |

# SCGN

**a**

|                    |                                                                                                                                                                       |
|--------------------|-----------------------------------------------------------------------------------------------------------------------------------------------------------------------|
| Proband phenotypes | Feeding difficulties in infancy<br>Seizures<br>Poor head control<br>Microcephaly<br>Specific learning disability<br>Congenital cataract<br>Global developmental delay |
| Inheritance        | Autosomal recessive homozygous                                                                                                                                        |
| Consequence        | splice_donor_variant                                                                                                                                                  |
| Position           | Chr6:g.25661873 G>A                                                                                                                                                   |
| Gene ID            | ENSG00000079689                                                                                                                                                       |
| Transcript change  | ENST00000377961.2:c.246+1G>A                                                                                                                                          |
| Protein change     | ENSP00000367197                                                                                                                                                       |

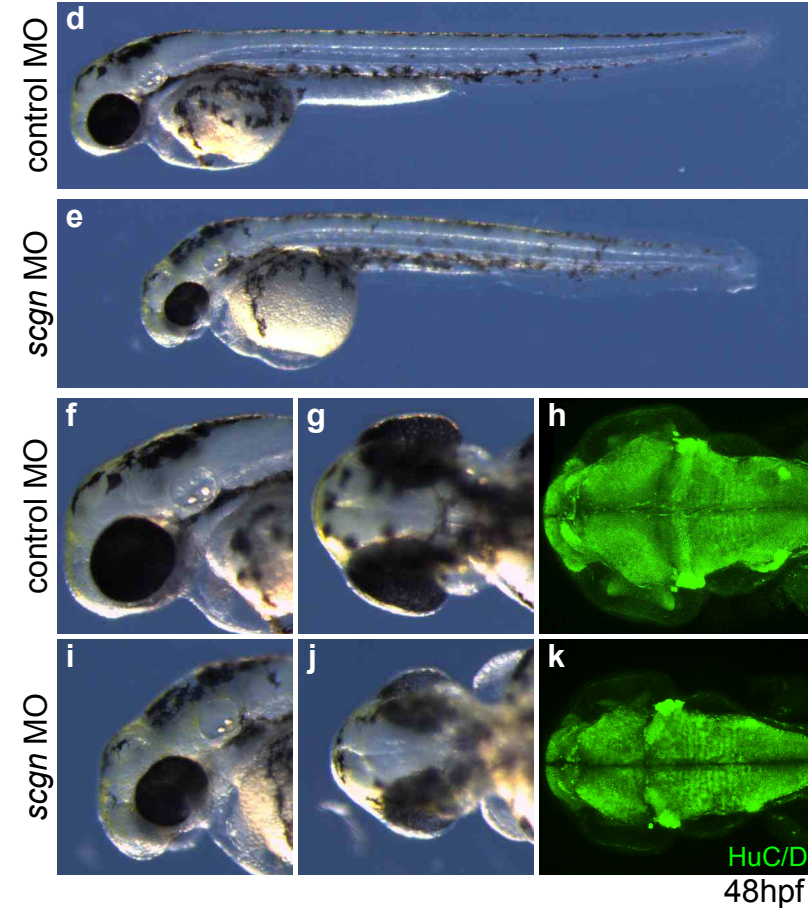

**b**

|                        |                                                                                              |
|------------------------|----------------------------------------------------------------------------------------------|
| Zebrafish              |                                                                                              |
| Gene                   | <i>scgn</i>                                                                                  |
| Gene ID                | ENSDARG00000058732                                                                           |
| Morpholino             | GTGGTTTATGTTTGATACCTTTGGC                                                                    |
| Knockdown confirmation | RT-PCR, 2nd Morpholino                                                                       |
| Relevant phenotypes    | Reduced head size(-12.3%, p<0.0003)<br>Reduced brain size(-17%, p<1.23 x 10 <sup>-15</sup> ) |
| Phenotypic concordance | Strong                                                                                       |

**c**

| MO dose |       | Stage       |                             | Entity      |             | Quality      |                  |
|---------|-------|-------------|-----------------------------|-------------|-------------|--------------|------------------|
| high    | 6ng   | ZFS:0000033 | Hatching: Long-pec (48 hpf) | ZFA:0001114 | Head        | PATO:0000587 | Decreased size   |
|         |       |             |                             | ZFA:0000008 | Brain       | PATO:0001450 | Edematous        |
|         |       |             |                             | ZFA:0000008 | Brain       | PATO:0000587 | Decreased size   |
|         |       |             |                             | ZFA:0000092 | Axis        | PATO:0000574 | Decreased length |
|         |       |             |                             | ZFA:0000054 | Pericardium | PATO:0001450 | Edematous        |
| high    | 6ng   | ZFS:0000037 | Larval: Day 5               | ZFA:0000008 | Brain       | PATO:0000587 | Decreased size   |
|         |       |             |                             | ZFA:0000092 | Axis        | PATO:0000461 | Normal length    |
| low     | 4.5ng | ZFS:0000033 | Hatching: Long-pec (48 hpf) | ZFA:0001114 | Head        | PATO:0000587 | Decreased size   |
|         |       |             |                             | ZFA:0000092 | Axis        | PATO:0000574 | Decreased length |



# SETD5

|                    |                                   |
|--------------------|-----------------------------------|
| Proband phenotypes | Dilatation of the ascending aorta |
|                    | Focal clonic seizures             |
|                    | Poor motor coordination           |
|                    | Specific learning disability      |
| Inheritance        | de novo                           |
| Consequence        | stop_gained                       |
| Position           | Chr3:g.9512572 G>T                |
| Gene ID            | ENSG00000168137                   |
| Transcript change  | ENST00000302463.6:c.2860G>T       |
| Protein change     | ENSP00000302028.6:p.Gly954Ter     |

|                        |                                                       |
|------------------------|-------------------------------------------------------|
| b Zebrafish            |                                                       |
| Gene                   | <i>setd5</i>                                          |
| Gene ID                | ENSDARG00000078576                                    |
| Morpholino             | ACGTCCAGCGCAGCAATGCAGGGAA                             |
| Knockdown confirmation | RT-PCR                                                |
| Relevant phenotypes    | Motility defect                                       |
|                        | Reduced head size (-16.9%, p=0.005)<br>Cardiac defect |
| Phenotypic concordance | Strong                                                |

| MO dose |     | Stage       |                             | Entity      |                            | Quality      |                |
|---------|-----|-------------|-----------------------------|-------------|----------------------------|--------------|----------------|
| high    | 6ng | ZFS:0000033 | Hatching: Long-pec (48 hpf) | GO:0008345  | Larval locomotory behavior | PATO:0000460 | Abnormal       |
|         |     |             |                             | ZFA:0000054 | Pericardium                | PATO:0001450 | Edematous      |
|         |     |             |                             | ZFA:0000114 | Heart                      | PATO:0000460 | Abnormal       |
|         |     |             |                             | ZFA:0001114 | Head                       | PATO:0000587 | Decreased size |
| high    | 6ng | ZFS:0000035 | day 3: Protruding-mouth     | GO:0008345  | Larval locomotory behavior | PATO:0000460 | Abnormal       |
|         |     |             |                             | ZFA:0000054 | Pericardium                | PATO:0001450 | Edematous      |
|         |     |             |                             | ZFA:0000114 | Heart                      | PATO:0000460 | Abnormal       |
|         |     |             |                             | ZFA:0001114 | Head                       | PATO:0000587 | Decreased size |

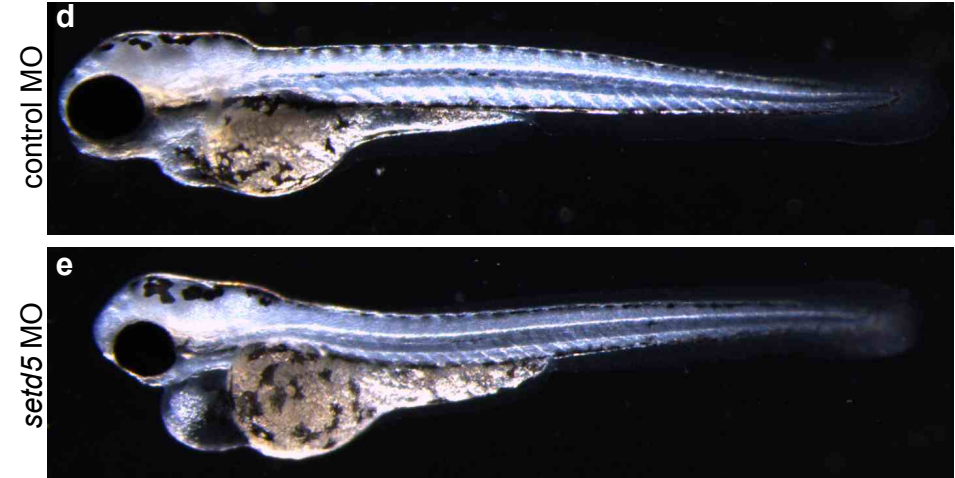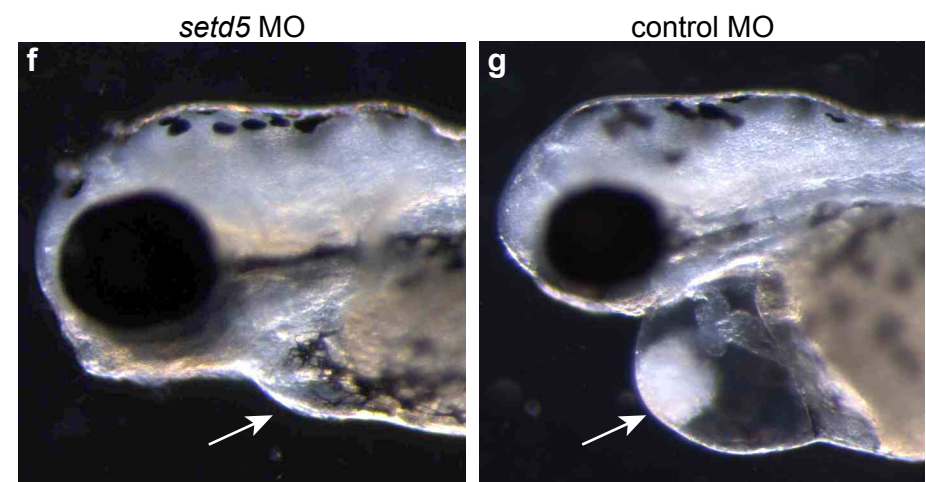

# SMARCD1

|   |                    |                                                                                                                                  |                                                                                                                                                                                                               |
|---|--------------------|----------------------------------------------------------------------------------------------------------------------------------|---------------------------------------------------------------------------------------------------------------------------------------------------------------------------------------------------------------|
| a | Proband phenotypes | Global developmental delay<br>Neonatal hypotonia<br>Plagiocephaly<br>Deeply set eye<br>Uplifted earlobe<br>Low anterior hairline | Laryngomalacia<br>Broad face<br>Coarse facial features<br>Downturned corners of mouth<br>Deep philtrum<br>Muscular hypotonia<br>Abnormality of the cerebral white matter<br>Abnormality of thyroid physiology |
|   | Inheritance        | de novo                                                                                                                          | de novo                                                                                                                                                                                                       |
|   | Consequence        | stop_gained                                                                                                                      | missense_variant                                                                                                                                                                                              |
|   | Position           | Chr12:g.50492561 G>A                                                                                                             | Chr12:g.50492587 T>C                                                                                                                                                                                          |
|   | Gene ID            | ENSG00000066117                                                                                                                  | ENSG00000066117                                                                                                                                                                                               |
|   | Transcript change  | ENST00000549274.1:c.255G>A                                                                                                       | ENST00000549274.1:c.281T>C                                                                                                                                                                                    |
|   | Protein change     | ENSP00000447909.1:p.Trp86Ter                                                                                                     | ENSP00000447909.1:p.Phe95Leu                                                                                                                                                                                  |

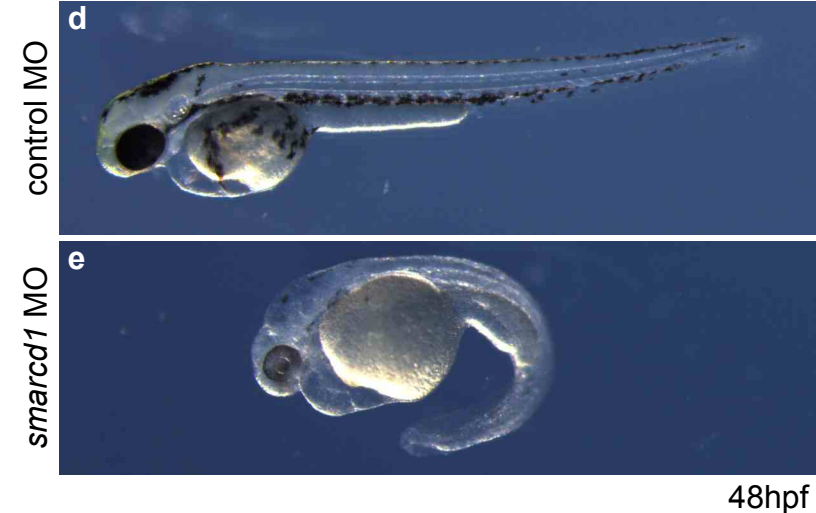

|                        |                            |
|------------------------|----------------------------|
| b                      | Zebrafish                  |
| Gene                   | <i>smarcd1</i>             |
| Gene ID                | ENSDARG00000019004         |
| Morpholino             | TTGTTCTCCTCGCGCCTTACCGGGT  |
| Knockdown confirmation | RT-PCR                     |
| Relevant phenotypes    | Severe multisystem defects |
| Phenotypic concordance | Weak                       |

| MO dose     |        | Stage        |                             | Entity      |              | Quality      |                     |
|-------------|--------|--------------|-----------------------------|-------------|--------------|--------------|---------------------|
| high        | 6ng    | ZFS:0000029  | day 1: Prim-5               | ZFA:0001094 | Whole embryo | PATO:0000638 | Apoptotic           |
| medium      | 3ng    | ZFS:0000033  | Hatching: Long-pec (48 hpf) | ZFA:0001094 | Whole embryo | PATO:0000587 | Decreased size      |
|             |        |              |                             | ZFA:0000075 | Spinal cord  | PATO:0000587 | Decreased size      |
|             |        |              |                             | ZFA:0000075 | Spinal cord  | PATO:0000592 | Decreased thickness |
|             |        |              |                             | ZFA:0001114 | Head         | PATO:0000587 | Decreased size      |
|             |        |              |                             | ZFA:0001115 | Trunk        | PATO:0001469 | Curved ventral      |
|             |        |              |                             | ZFA:0000008 | Brain        | PATO:0000460 | Abnormal            |
|             |        |              |                             | ZFA:0000075 | Spinal cord  | PATO:0000587 | Decreased size      |
|             |        |              |                             | ZFA:0000075 | Spinal cord  | PATO:0000592 | Decreased thickness |
|             |        |              |                             | ZFA:0009091 | melanocyte   | PATO:0001997 | Decreased number    |
|             |        |              |                             | ZFA:0000107 | Eye          | PATO:0000587 | Decreased size      |
| ZFA:0000155 | Somite | PATO:0000460 | Abnormal                    |             |              |              |                     |
| ZFA:0000114 | Heart  | PATO:0000460 | Abnormal                    |             |              |              |                     |

# THNSL2

**a**

|                    |                                                                                                               |                                |
|--------------------|---------------------------------------------------------------------------------------------------------------|--------------------------------|
| Proband phenotypes | Microcephaly<br>Macrotia<br>Soft doughy skin<br>Long palpebral fissure<br>Large eyes<br>Highly arched eyebrow | Global developmental delay     |
| Inheritance        | Autosomal recessive homozygous                                                                                | Autosomal recessive homozygous |
| Consequence        | splice_donor_variant                                                                                          | splice_donor_variant           |
| Position           | Chr2:g.88478534 T>C                                                                                           | Chr2:g.88478534 T>C            |
| Gene ID            | ENSG00000144115                                                                                               | ENSG00000144115                |
| Transcript change  | ENST00000324166.5:c.802+2T>C                                                                                  | ENST00000324166.5:c.802+2T>C   |
| Protein change     | ENSP00000327323                                                                                               | ENSP00000327323                |

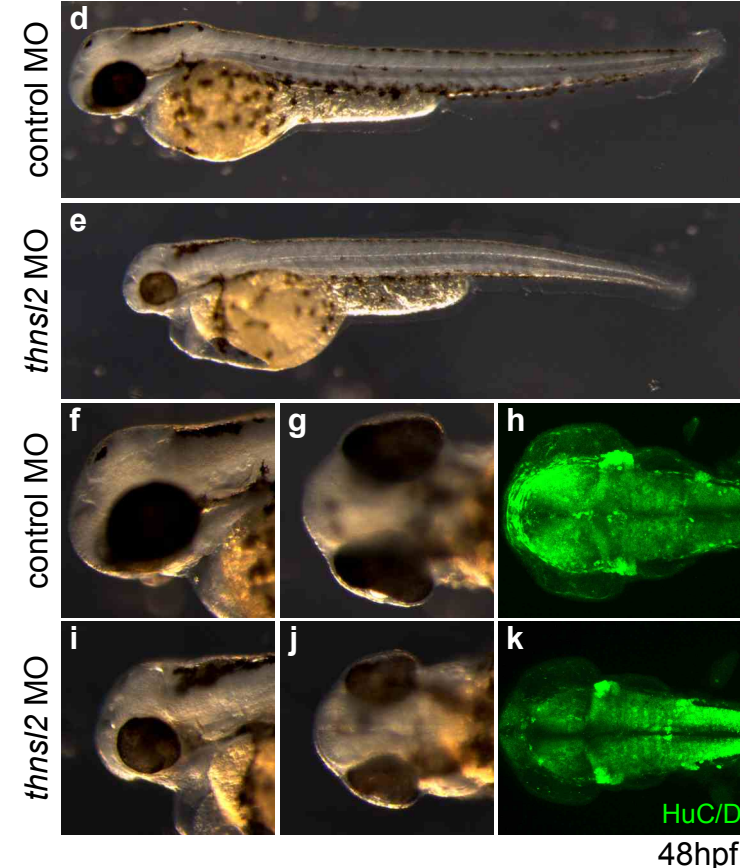

**b**

|                        |                                                                                                               |
|------------------------|---------------------------------------------------------------------------------------------------------------|
| Zebrafish              |                                                                                                               |
| Gene                   | <i>thnsl2</i>                                                                                                 |
| Gene ID                | ENSDARG00000032584                                                                                            |
| Morpholino             | AAGTAAACCTGAAGCGGCACCTGGA                                                                                     |
| Knockdown confirmation | RT-PCR, 2nd Morpholino                                                                                        |
| Relevant phenotypes    | Reduced head size(-15.1, $p < 1.3 \times 10^{-12}$ )<br>Reduced brain size(-16.1%, $p < 1.6 \times 10^{-5}$ ) |
| Phenotypic concordance | Strong                                                                                                        |

**c**

| MO dose |     | Stage       |                             | Entity      |                            | Quality      |                |
|---------|-----|-------------|-----------------------------|-------------|----------------------------|--------------|----------------|
| high    | 6ng | ZFS:0000033 | Hatching: Long-pec (48 hpf) | ZFA:0001114 | Head                       | PATO:0000587 | Decreased size |
|         |     |             |                             | ZFA:0000107 | Eye                        | PATO:0000587 | Decreased size |
|         |     |             |                             | ZFA:0000008 | Brain                      | PATO:0001450 | Edematous      |
|         |     |             |                             | ZFA:0000008 | Brain                      | PATO:0000587 | Decreased size |
|         |     |             |                             | ZFA:0000054 | Pericardium                | PATO:0001450 | Edematous      |
|         |     |             |                             | ZFA:0000114 | Heart                      | PATO:0000460 | Abnormal       |
|         |     |             |                             | GO:0008345  | Larval locomotory behavior | PATO:0000460 | Abnormal       |

# WWC1

**a**

|                    |                                                                                                                                          |
|--------------------|------------------------------------------------------------------------------------------------------------------------------------------|
| Proband phenotypes | Delayed developmental milestones<br>Mental retardation<br>Hypertelorism<br>Hypoplasia of the corpus callosum<br>Absent or delayed speech |
| Inheritance        | de novo                                                                                                                                  |
| Consequence        | missense_variant                                                                                                                         |
| Position           | Chr5:g.167891774 G>A                                                                                                                     |
| Gene ID            | ENSG00000113645                                                                                                                          |
| Transcript change  | ENST00000265293.4:c.2957G>A                                                                                                              |
| Protein change     | ENSP00000265293.4:p.Arg986His                                                                                                            |

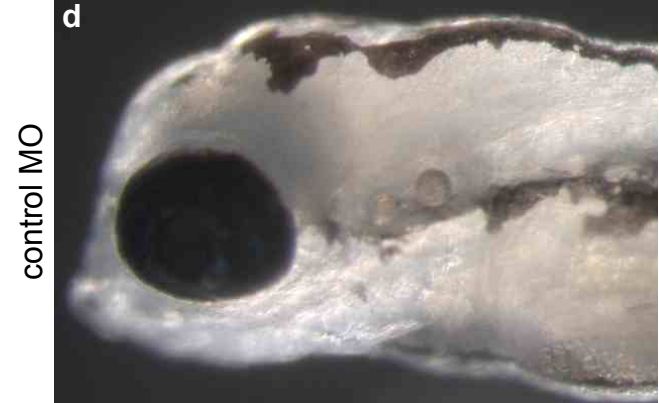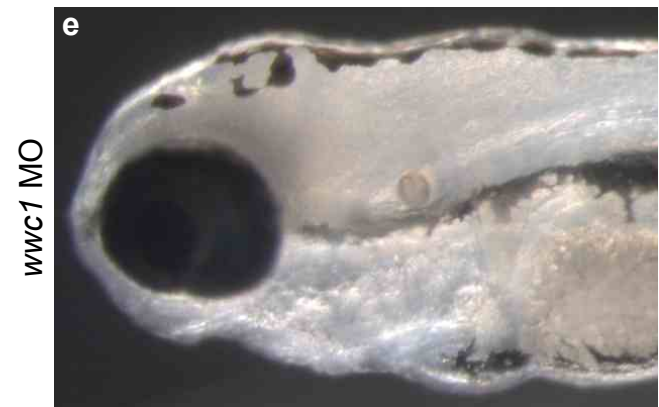

**b**

|                        |                           |
|------------------------|---------------------------|
| Zebrafish              |                           |
| Gene                   | <i>wwc1</i>               |
| Gene ID                | ENSDARG00000076041        |
| Morpholino             | GCAGTACTCATCACATACCTATCCC |
| Knockdown confirmation | RT-PCR                    |
| Relevant phenotypes    | none                      |
| Phenotypic concordance | None                      |

**c**

| MO dose |     | Stage       |                             | Entity      |                            | Quality      |                  |
|---------|-----|-------------|-----------------------------|-------------|----------------------------|--------------|------------------|
| high    | 6ng | ZFS:0000033 | Hatching: Long-pec (48 hpf) | ZFA:0000051 | Otic vesicle               | PATO:0000646 | Malformed        |
|         |     |             |                             | ZFA:0001617 | Otolith                    | PATO:0001997 | Decreased number |
| high    | 6ng | ZFS:0000035 | day 3: Protruding-mouth     | GO:0008345  | Larval locomotory behavior | PATO:0000460 | Abnormal         |
|         |     |             |                             | ZFA:0001617 | Otolith                    | PATO:0001997 | Decreased number |
| high    | 6ng | ZFS:0000037 | Larval: Day 5               | ZFA:0001114 | Head                       | PATO:0000646 | Malformed        |
|         |     |             |                             | GO:0008345  | Larval locomotory behavior | PATO:0000461 | Normal           |

# ZRANB1

|                    |                                           |                                         |
|--------------------|-------------------------------------------|-----------------------------------------|
| Proband phenotypes | Microcephaly                              | Microcephaly                            |
|                    | Constipation                              | Constipation                            |
|                    | Facial muscle weakness                    | Iris coloboma                           |
|                    | Moderate Seizures                         | Global developmental delay              |
|                    | Tongue fasciculations                     | Delayed speech and language development |
|                    | Intracranial calcification by x-ray or ct | Joint hypermobility                     |
|                    |                                           | Hirsutism                               |
|                    | Long palpebral fissure                    |                                         |
|                    | Depressed nasal bridge                    |                                         |
|                    | Thick lower lip vermilion                 |                                         |
|                    | Widely spaced teeth                       |                                         |
|                    | Drooling                                  |                                         |
|                    | Smooth philtrum                           |                                         |
|                    | Autism                                    |                                         |
| Inheritance        | de novo                                   | de novo                                 |
| Consequence        | missense_variant                          | missense_variant                        |
| Position           | Chr10:g.126662852 C>T                     | Chr10:g.126662892 C>T                   |
| Gene ID            | ENSG00000019995                           | ENSG00000019995                         |
| Transcript change  | ENST00000359653.4:c.1312C>T               | ENST00000359653.4:c.1352C>T             |
| Protein change     | ENSP00000352676.4:p.Arg438Trp             | ENSP00000352676.4:p.Ala451Val           |

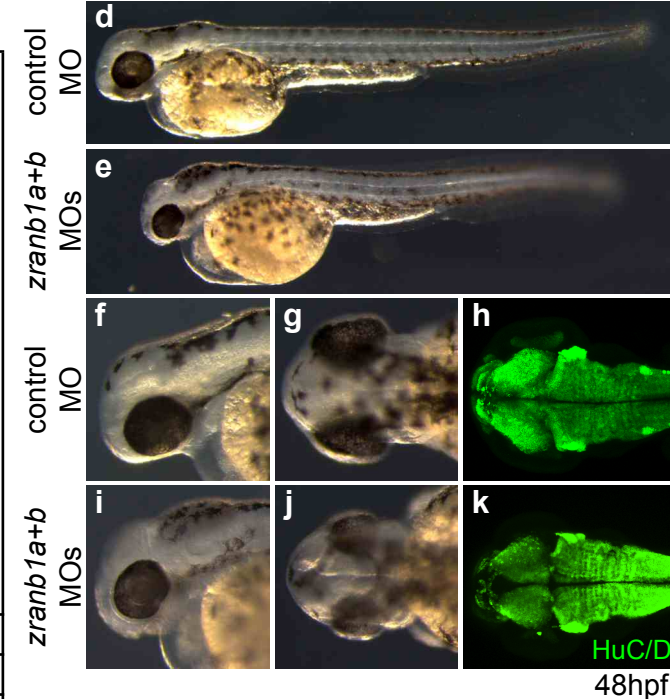

|                        |                                                                                                                                         |                           |
|------------------------|-----------------------------------------------------------------------------------------------------------------------------------------|---------------------------|
| Zebrafish              |                                                                                                                                         |                           |
| Gene                   | <i>CABZ01057907.1 (zranb1a)</i>                                                                                                         | <i>zranb1b</i>            |
| Gene ID                | ENSDARG00000060257                                                                                                                      | ENSDARG00000063190        |
| Morpholino             | TAAATAACTTGGGTGCAGACCTGAC                                                                                                               | TAATGGAGCGGATTTCTCACCAGCA |
| Knockdown confirmation | RT-PCR                                                                                                                                  | RT-PCR                    |
| Relevant phenotypes    | Reduced head size(-8.2%, $p < 5.4 \times 10^{-6}$ ) in double knockdown<br>Reduced brain size(-9.2%, $p < 0.0015$ ) in double knockdown |                           |
| Phenotypic concordance | Strong                                                                                                                                  |                           |

| MO dose |         | Stage       |                             | Entity      |              | Quality      |                |
|---------|---------|-------------|-----------------------------|-------------|--------------|--------------|----------------|
| high    | 5ng+5ng | ZFS:0000033 | Hatching: Long-pec (48 hpf) | ZFA:0000008 | Brain        | PATO:0001450 | Edematous      |
|         |         |             |                             | ZFA:0001114 | Head         | PATO:0000646 | Malformed      |
|         |         |             |                             | ZFA:0001114 | Head         | PATO:0000587 | Decreased size |
|         |         |             |                             | ZFA:0000008 | Brain        | PATO:0000587 | Decreased size |
| high    | 5ng+5ng | ZFS:0000035 | day 3: Protruding-mouth     | ZFA:0000054 | Pericardium  | PATO:0001450 | Edematous      |
|         |         |             |                             | ZFA:0001115 | Trunk        | PATO:0001469 | Curved ventral |
| high    | 5ng+5ng | ZFS:0000036 | Larval:Day 4                | ZFA:0001094 | Whole embryo | PATO:0000587 | Decreased size |
| high    | 5ng+5ng | ZFS:0000037 | Larval:Day 5                | ZFA:0001114 | Head         | PATO:0000646 | Malformed      |
